# Supplementary material
Source: PubMed Central journal article supplement (PMC8040783)

**A***SHIV.CAP256SU.dCT*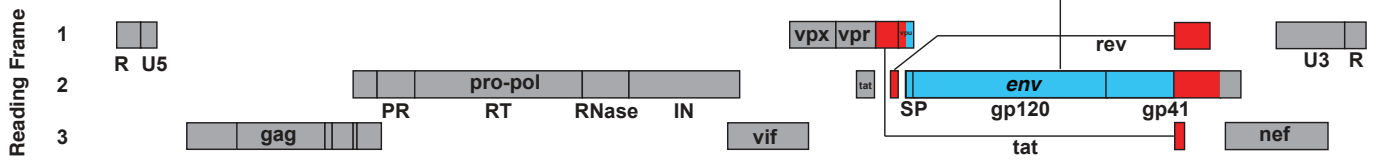**B**

SHIV.CAP256SU Env375 variant

|          | 375S   | 375M   | 375Y   | 375H   | 375W   | 375F   |
|----------|--------|--------|--------|--------|--------|--------|
| PGT121   | 0.051  | 0.042  | 0.046  | 0.044  | 0.036  | 0.031  |
| 8ANC195  | 13.3   | 16.3   | 13.9   | 17.3   | 22.4   | 17.3   |
| 10E8     | 5.9    | 6.9    | 9.2    | 12.6   | 10.6   | 5.2    |
| VRC01    | 0.11   | 0.14   | 0.22   | 0.21   | 0.52   | 0.77   |
| PG9      | 0.038  | 0.050  | 0.053  | 0.048  | 0.063  | 0.038  |
| PGDM1400 | 0.005  | 0.007  | 0.005  | 0.006  | 0.010  | 0.006  |
| VRC26.25 | 0.0003 | 0.0004 | 0.0004 | 0.0006 | 0.0006 | 0.0003 |
| 447-52D  | >25    | >25    | >25    | >25    | >25    | >25    |
| 17b      | >25    | >25    | >25    | >25    | >25    | >25    |

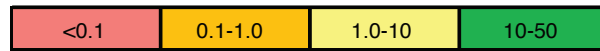

IC50 ug/mL

**C**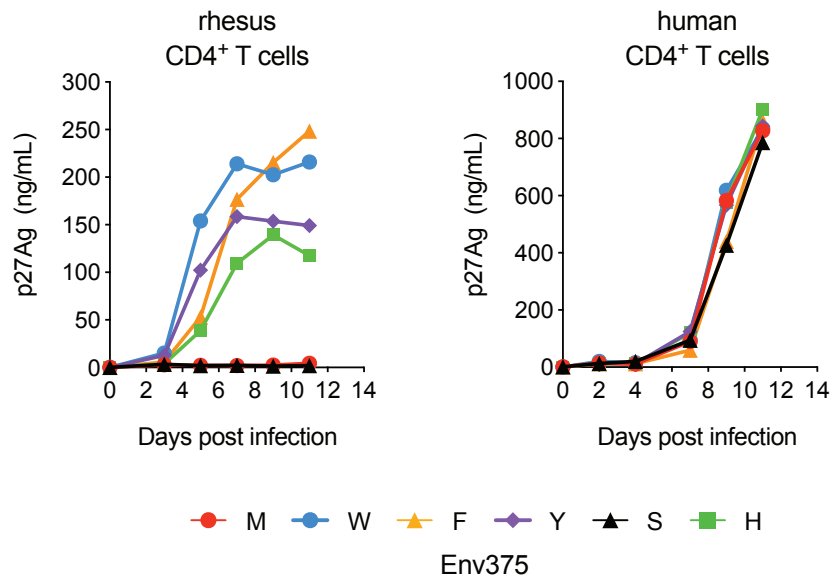



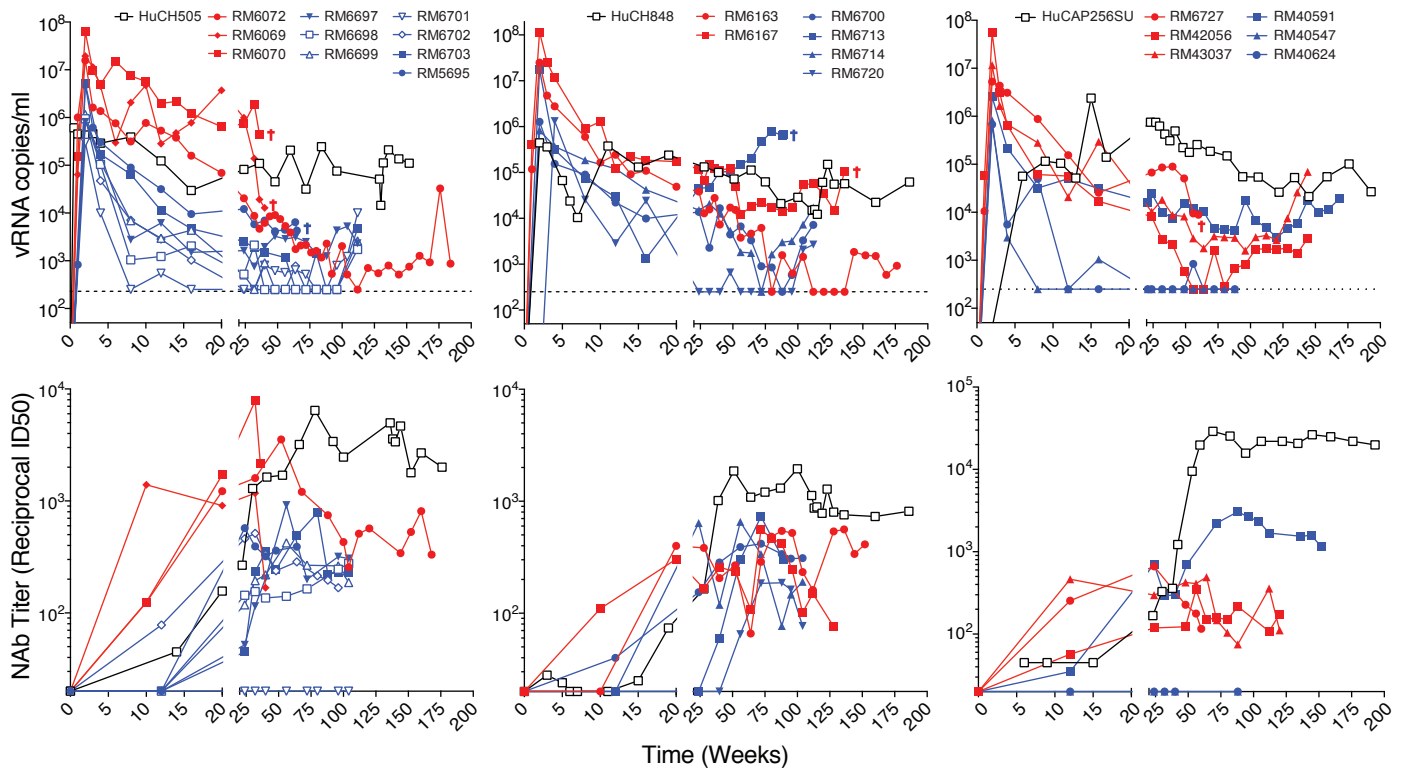

Supplemental Figure S2

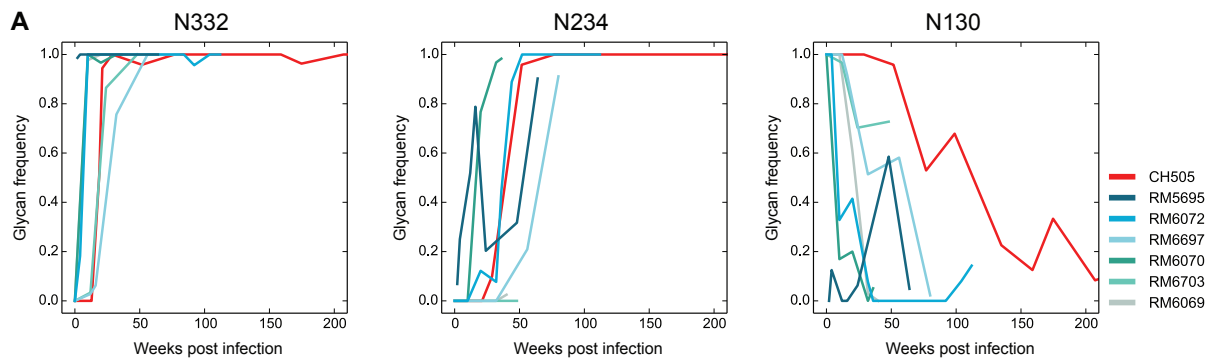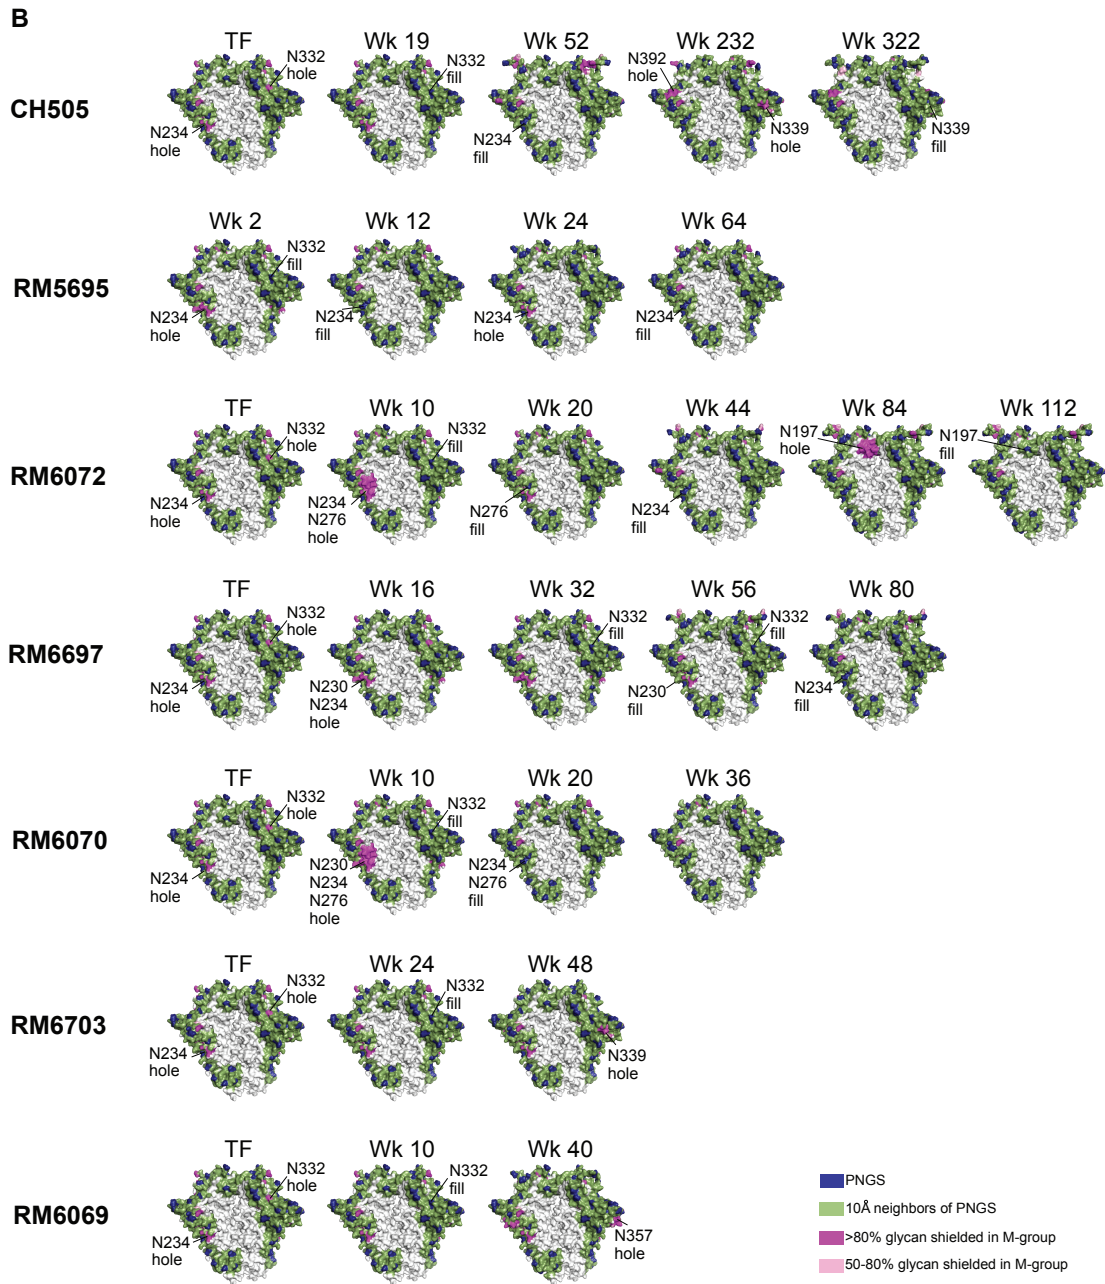

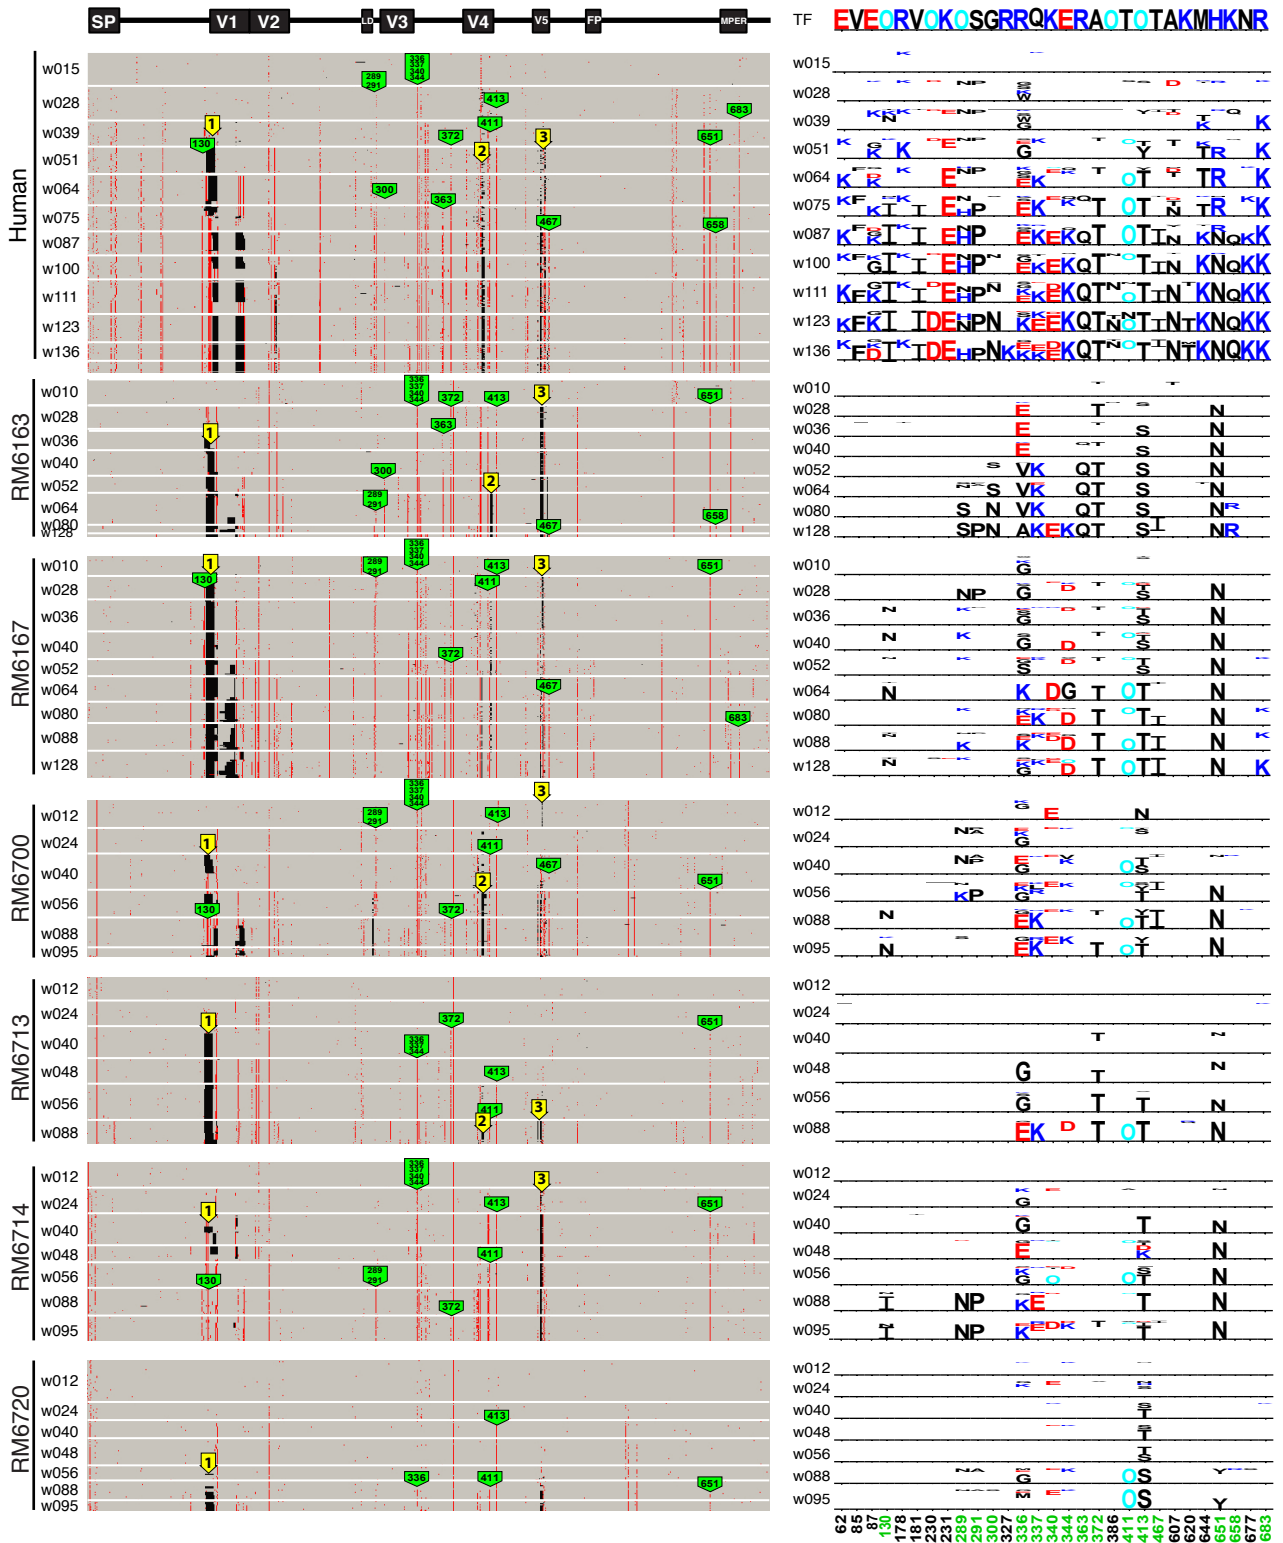

Supplementary Figure S4

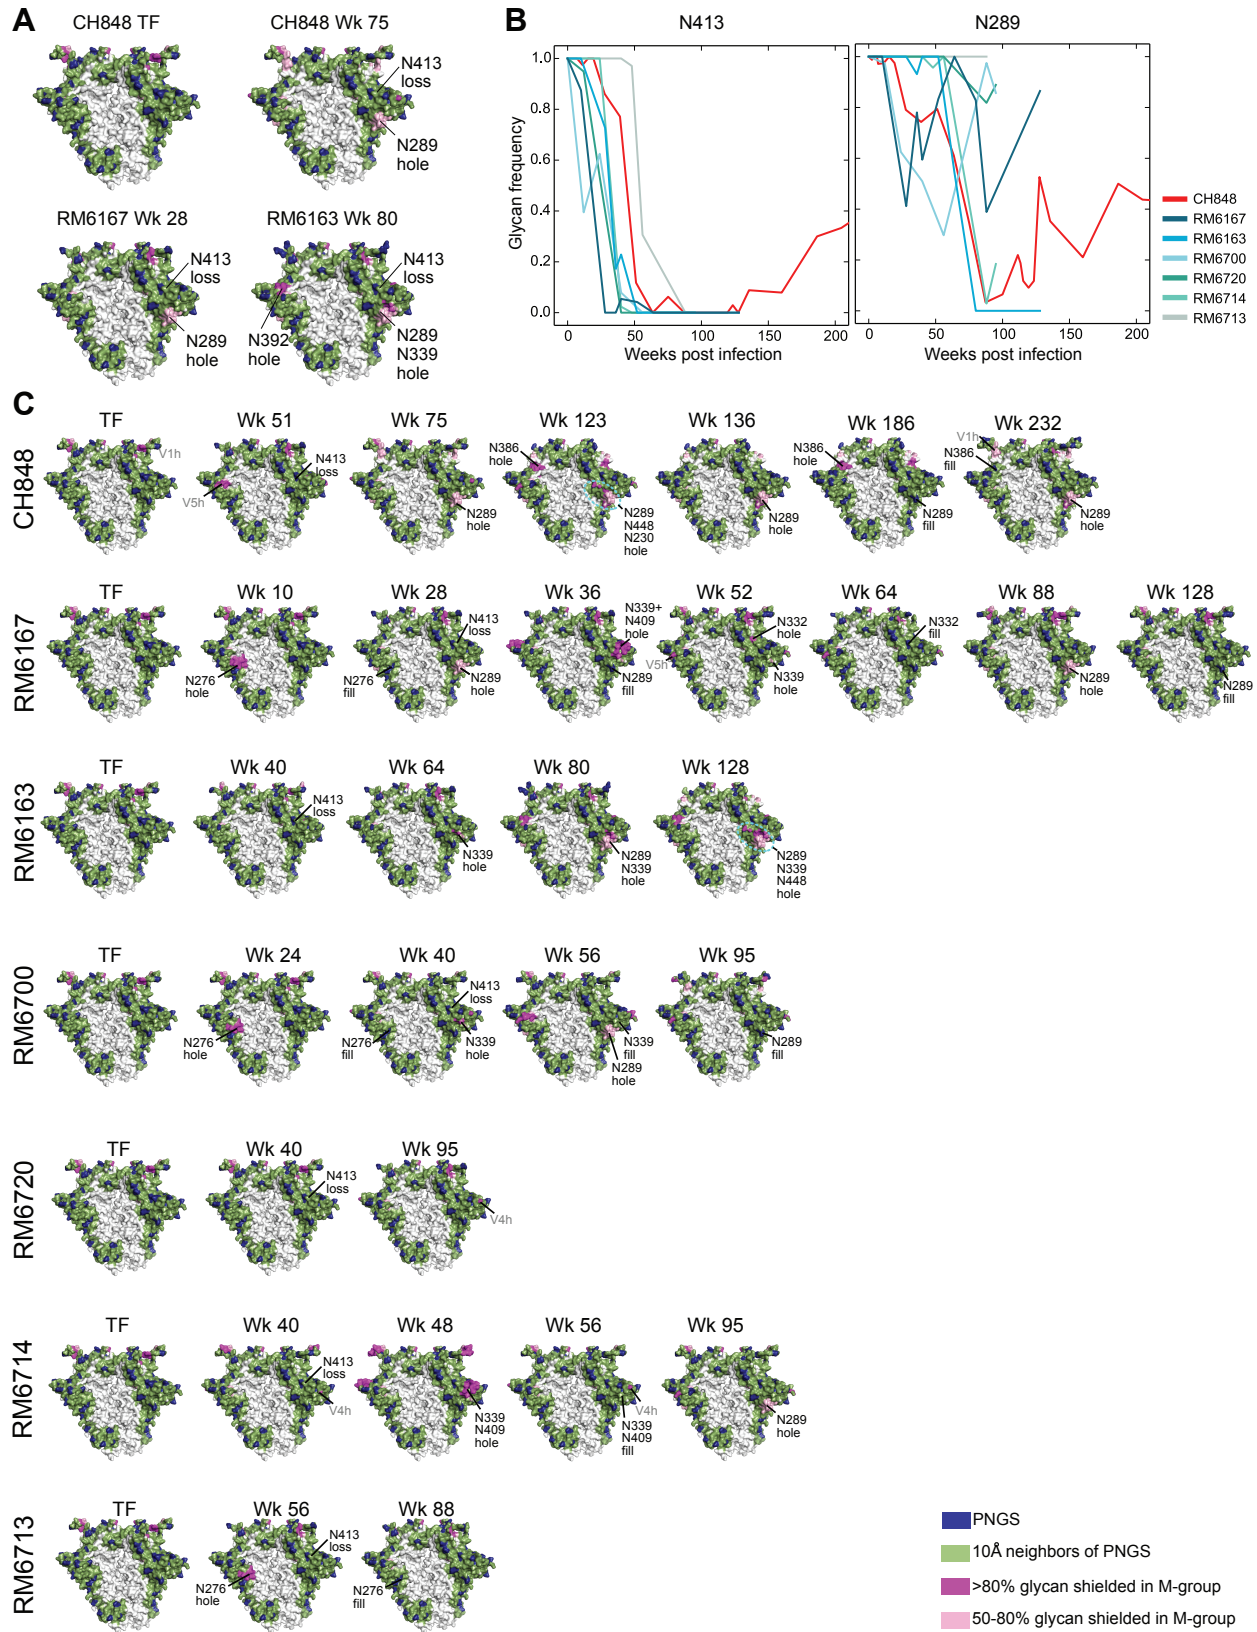

Supplemental Figure S5

**A**CH505 TF  
CH848 TF  
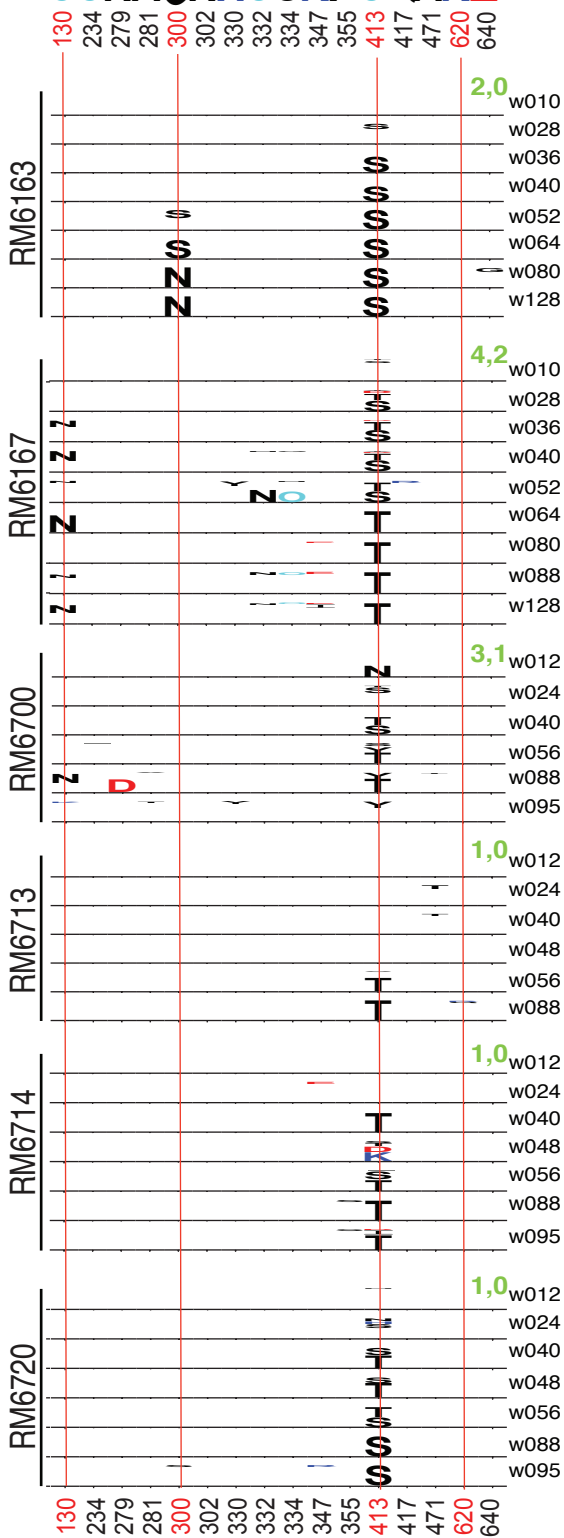

The human CH505 sites identified by LASSIE applied to SHIV CH848 infected macaques

**B**CH848 TF  
CH505 TF  
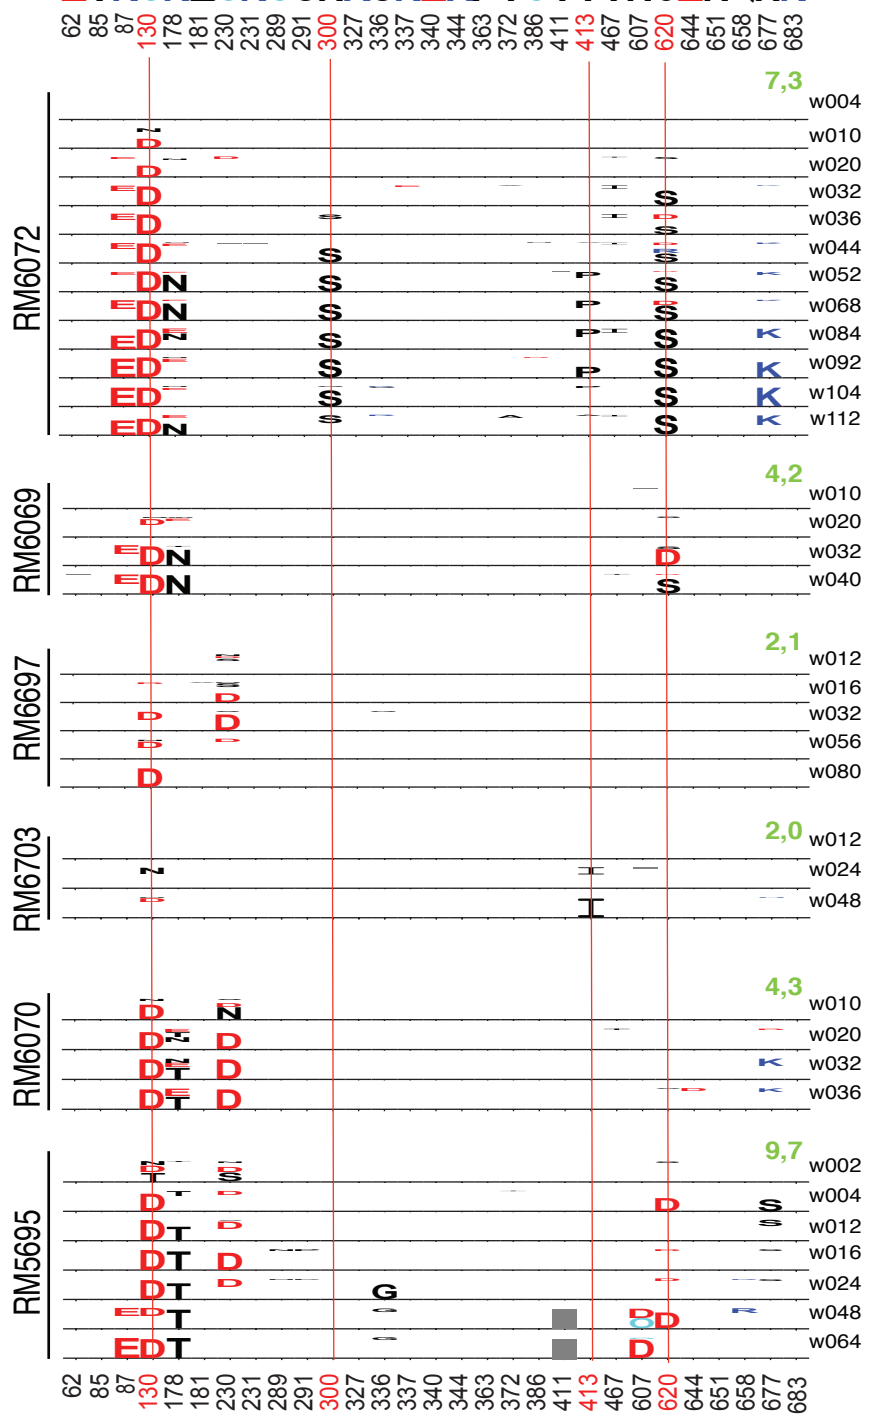

The human CH848 sites identified by LASSIE applied to SHIV CH505 infected macaques

**TF Loss:**

Total number of sites, followed by selected sites not shared between CH848 and CH505



**A**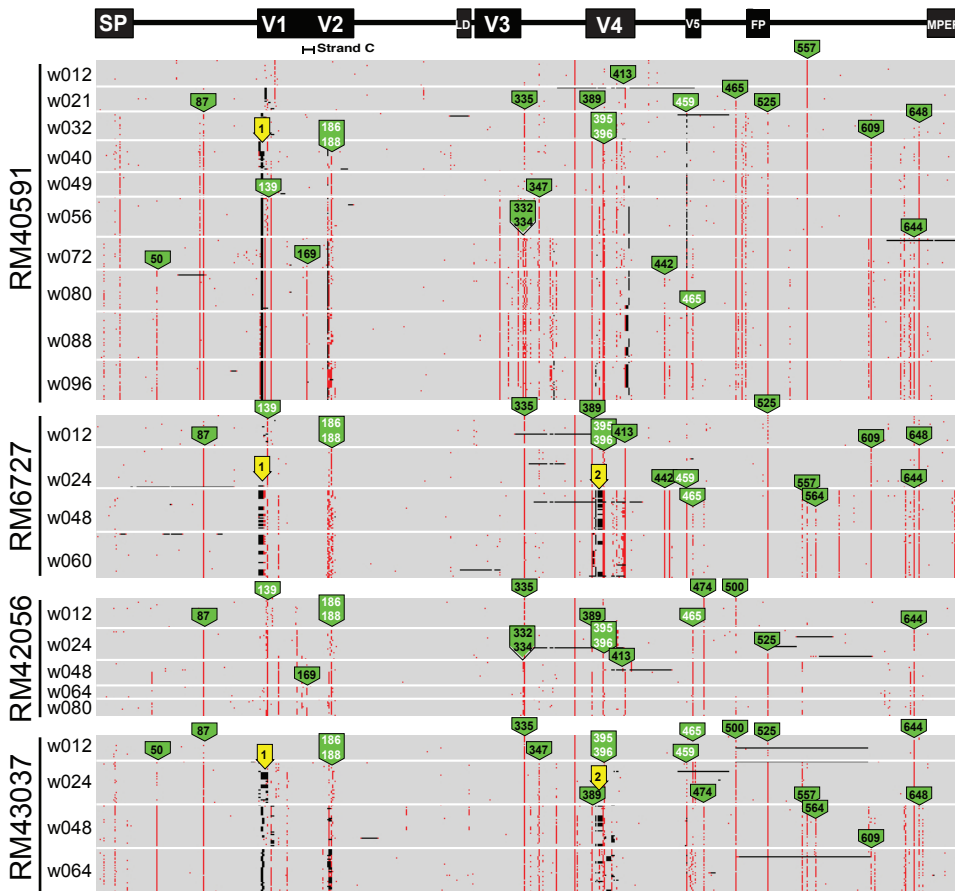**B**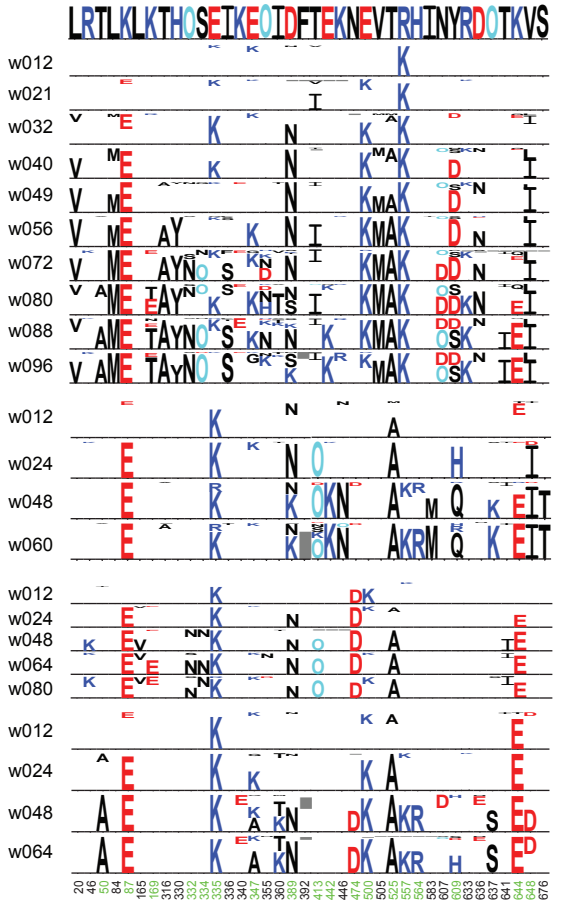**C**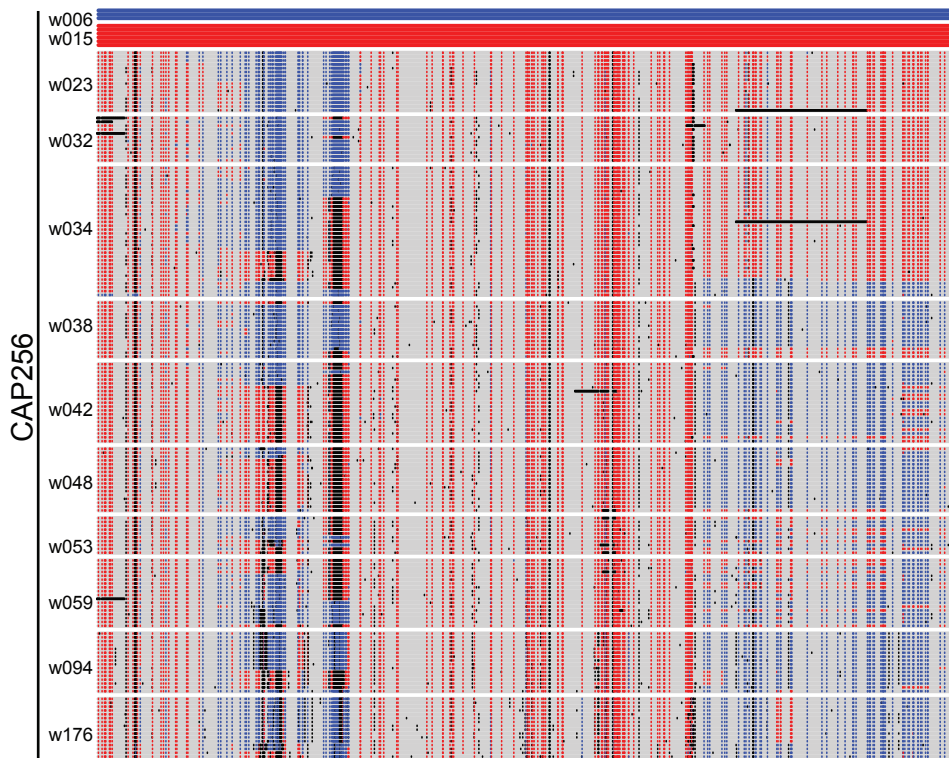**D**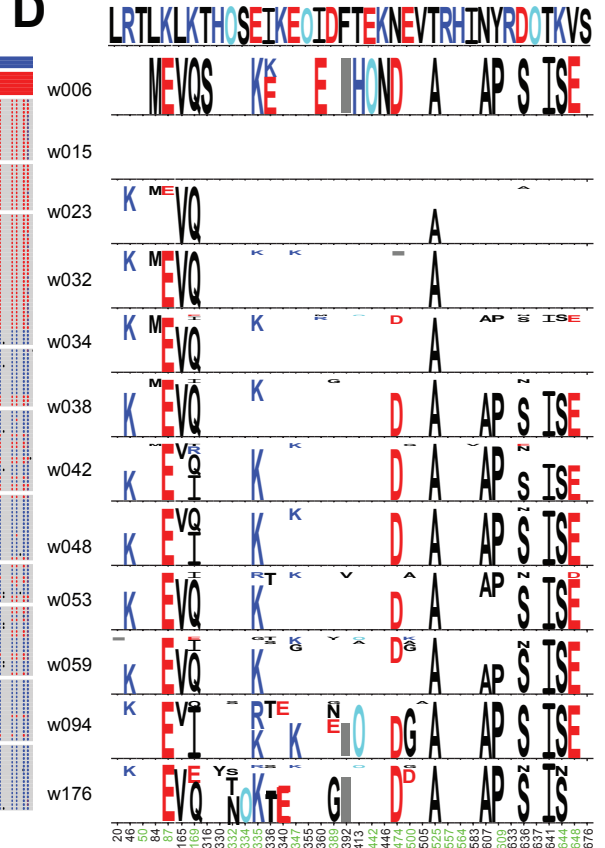

**A**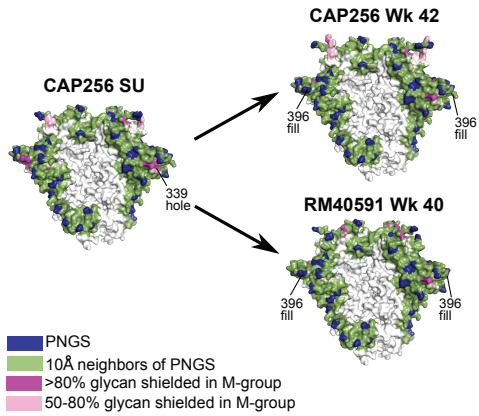**B**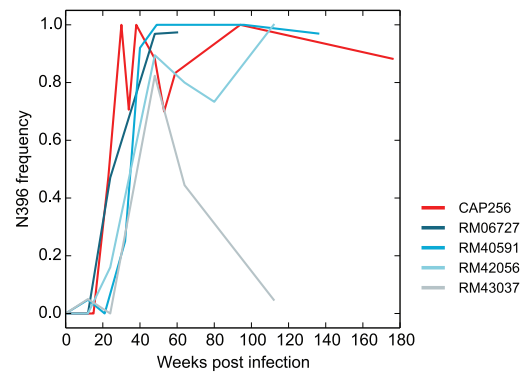**C**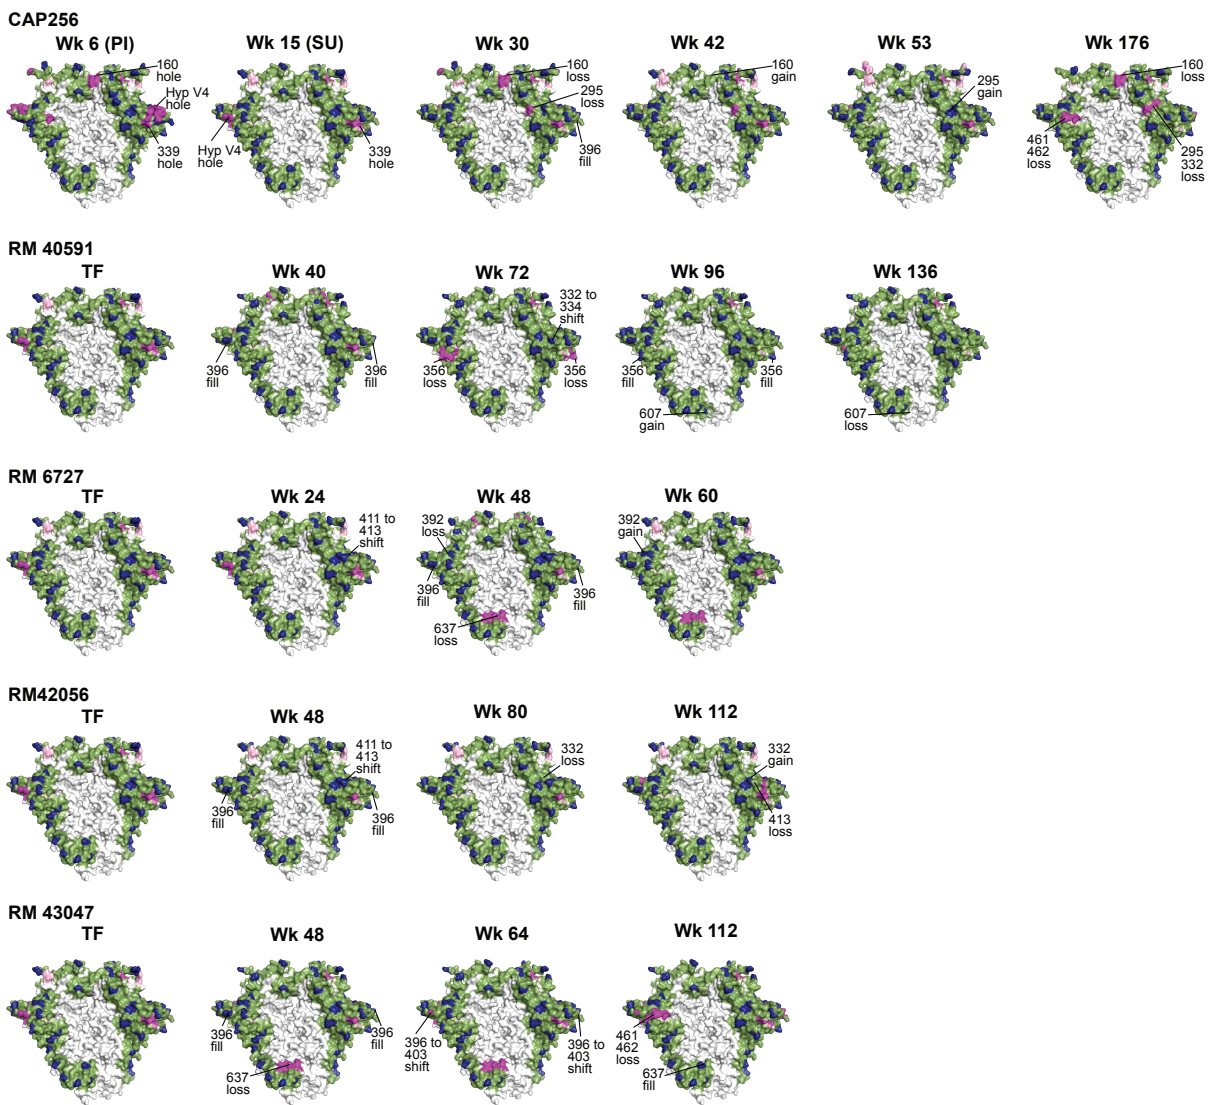





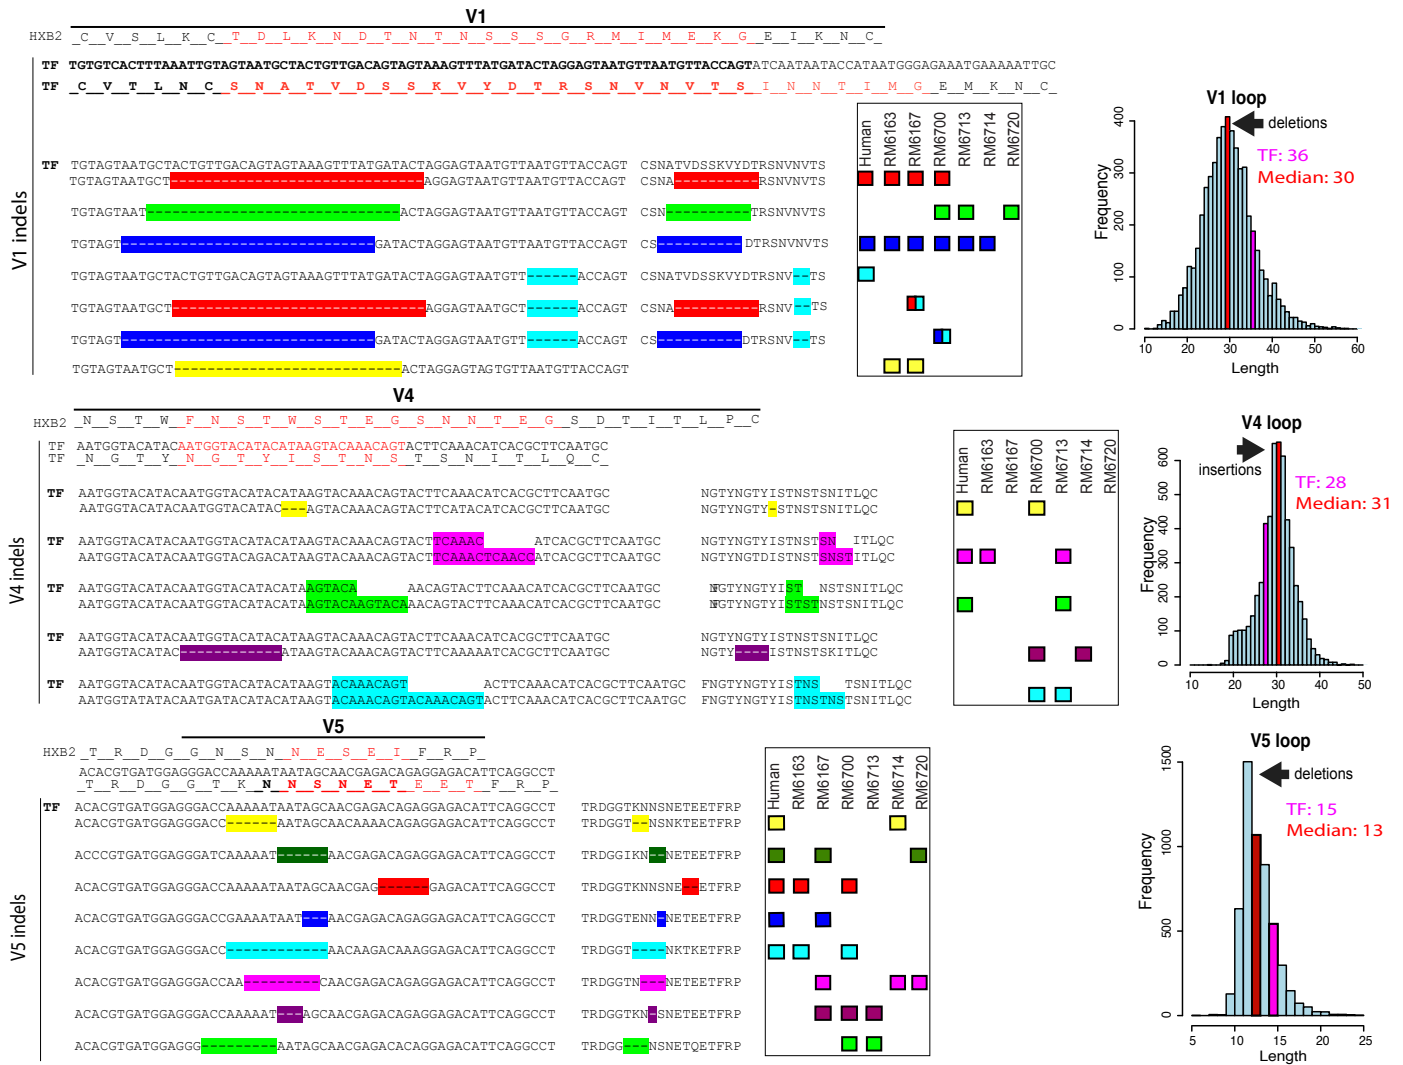

**A**

| Virus                                               | Mutation Location | RM6072 plasma |       |
|-----------------------------------------------------|-------------------|---------------|-------|
|                                                     |                   | w10           | w20   |
| TF_ID50                                             |                   | 286           | 2,397 |
| TF_RID50 (ID50 <sub>mut</sub> /ID50 <sub>TF</sub> ) |                   | 1             | 1     |
| N130D                                               | V1                | 0.3           | 0.6   |
| T234N                                               | C2                | 0.3           | 1.2   |
| N279D                                               | Loop-D            | <0.1          | 0.7   |
| V281I                                               | Loop-D            | <0.1          | 0.7   |
| K302N                                               | V3                | 224.3         | 51.9  |
| Y330H                                               | V3                | 0.7           | 1.5   |
| N334S                                               | V3C3              | 0.2           | 0.4   |
| H417R                                               | V4                | 1.1           | 1.2   |
| K460E                                               | V5                | <0.1          | 1.8   |

>3 fold resistant >3 fold sensitive

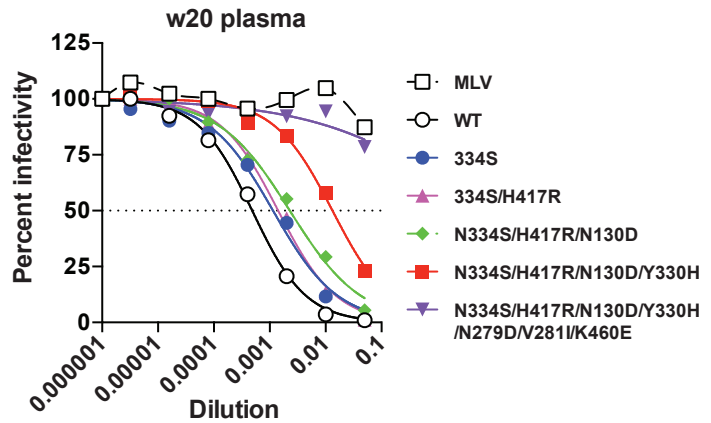

**B**

| Virus                       | Mutation Location | RM6072 V3 mAbs |       |
|-----------------------------|-------------------|----------------|-------|
|                             |                   | DH647          | DH648 |
| TF_IC <sub>50</sub> (ug/ml) |                   | 2.2            | 1.0   |
| N130D                       | V1                | 3.3            | 0.9   |
| K302N                       | V3                | 15.5           | >20   |
| Y330H                       | V3                | 2.5            | 1.8   |
| N334S                       | V3C3              | >20            | >20   |
| H417R                       | V4                | 2.0            | 2.0   |

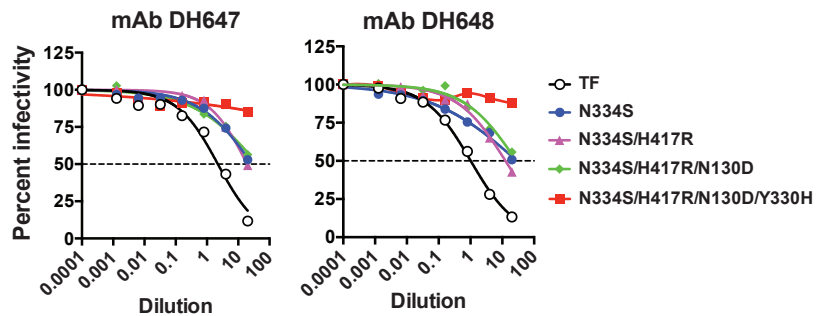

**C**

| Virus                       | Mutation Location | RM6072 CD4bs mAbs |       | Human CH505 CD4bs mAbs |           |         |
|-----------------------------|-------------------|-------------------|-------|------------------------|-----------|---------|
|                             |                   | DH650.UCA         | DH650 | CH235.UCA              | CH235.IA3 | CH235.9 |
| TF_IC <sub>50</sub> (ug/ml) |                   | >20               | 2.2   | >20                    | 3.6       | 0.4     |
| T234N                       | C2                | >20               | >20   | >20                    | >20       | 0.6     |
| N279D                       | Loop-D            | >20               | >20   | >20                    | >20       | 0.4     |
| V281I                       | Loop-D            | >20               | 3.5   | >20                    | 5.6       | 0.2     |
| K460E                       | V5                | >20               | >20   | >20                    | 13.2      | 1.3     |

**A**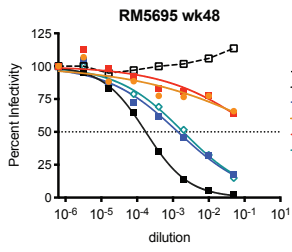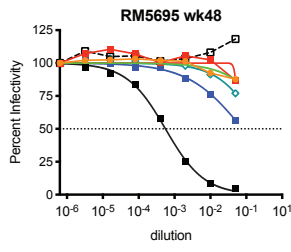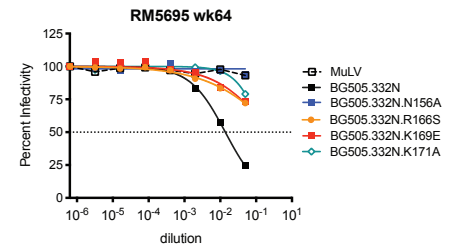**B**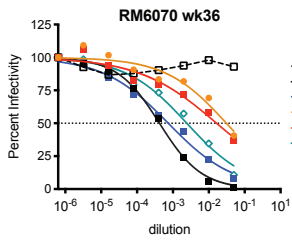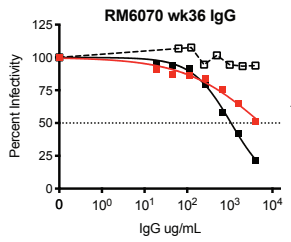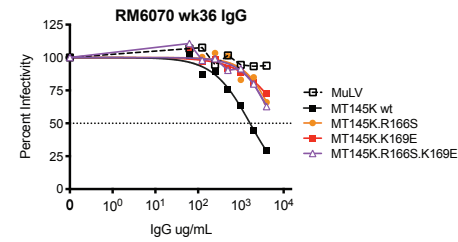**C**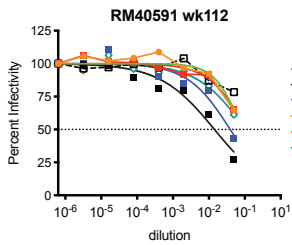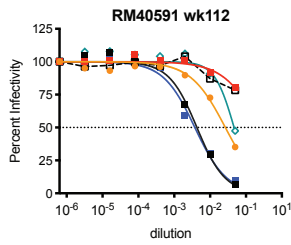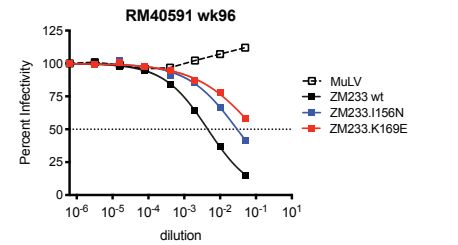**D**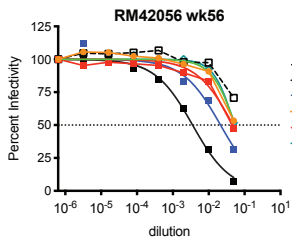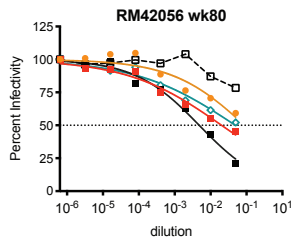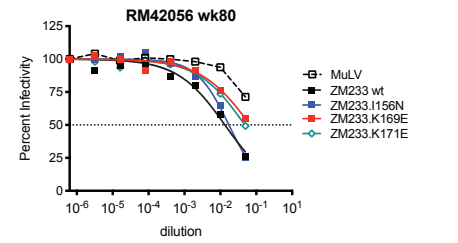

**A**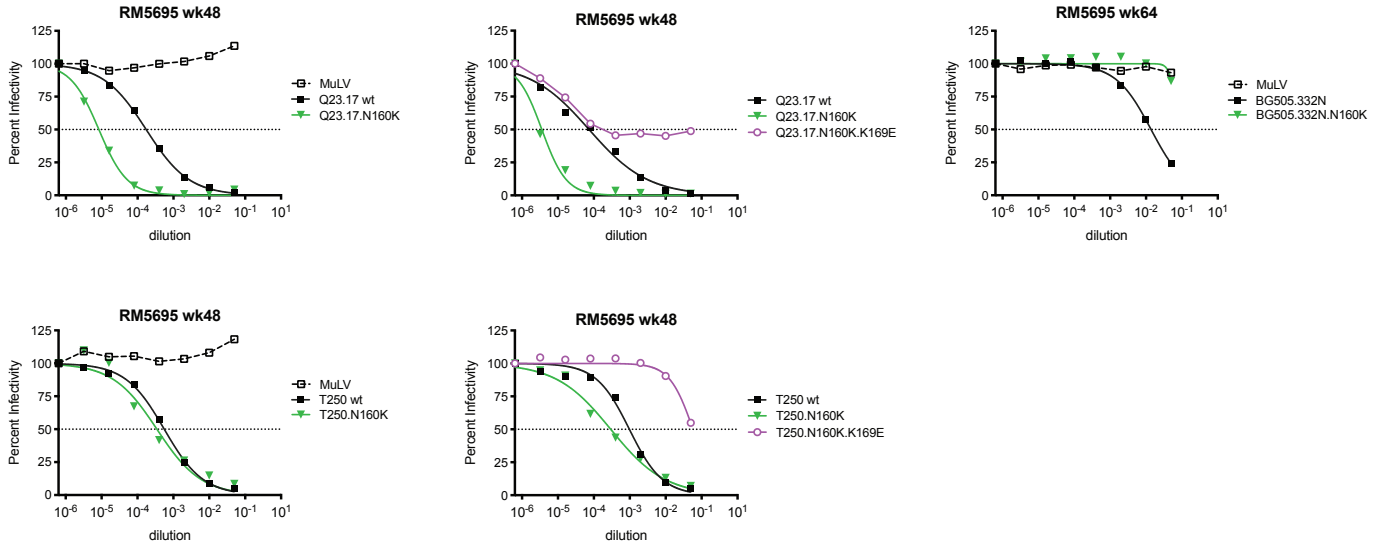**B**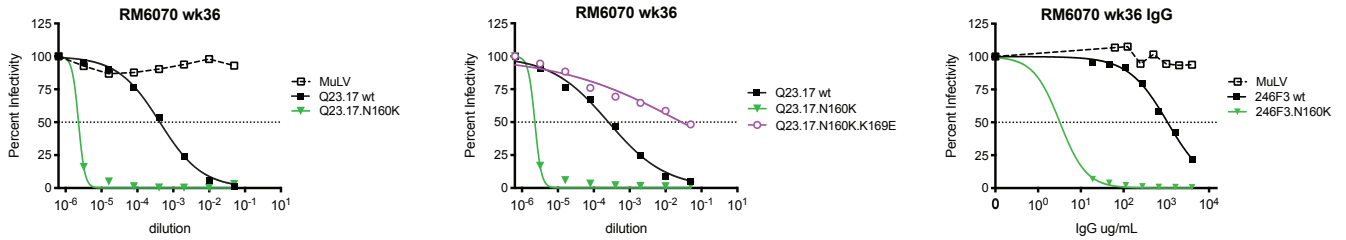**C**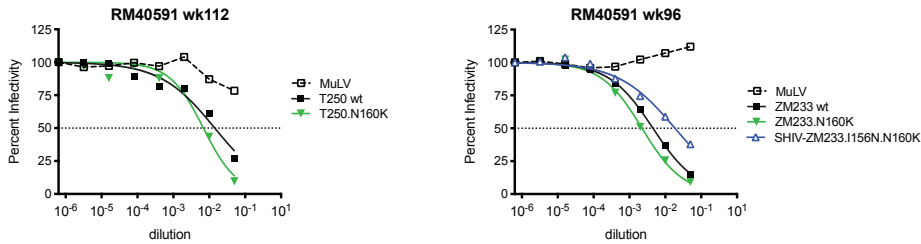**D**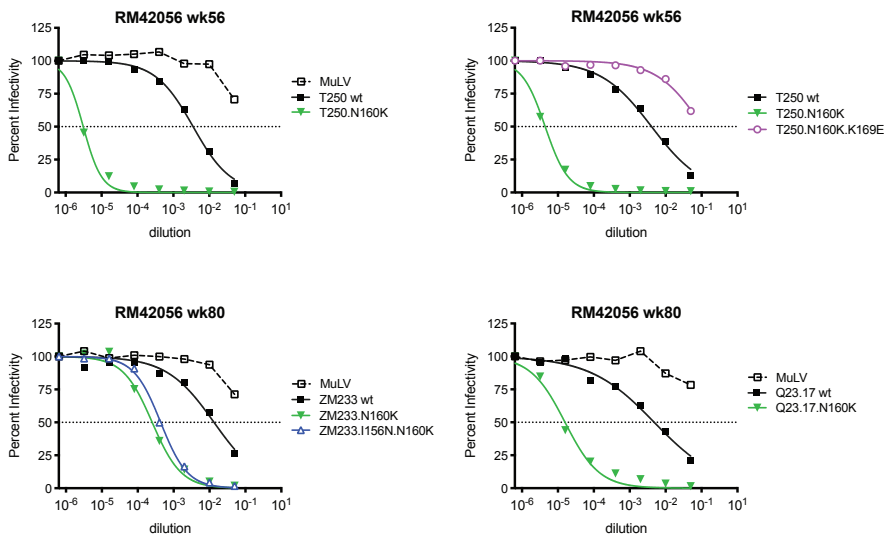

**A** Autologous NAb responses to wildtype and V1 deleted variants of CH848 TF in SHIV CH848 infected RM plasma

| Animal ID | Plasma timepoint | CH848 TF | CH848 R336G | CH848 TFdV1 (V1Δ10aa) | w36con (V1Δ10aa+ Mut) |
|-----------|------------------|----------|-------------|-----------------------|-----------------------|
| RM6167    | w10              | 220      | 72          | 130                   | <20                   |
|           | w36              | 435      | ND          | 948                   | 28                    |

**B** Epitope mapping of autologous, strain-specific neutralizing mAbs from RM6163

| Animal ID | Antibody ID | CH848 TF | CH848 TFdV1 (Δ10aa) | CH848 N301D | CH848 N332D |
|-----------|-------------|----------|---------------------|-------------|-------------|
| RM6163    | DH898.1     | 2.84     | 11.49               | 3.19        | >50         |
| w52 LN    | DH898.2     | 6.57     | 27.38               | 8.56        | >50         |
|           | DH898.3     | 3.69     | 16.35               | 5.93        | >50         |
|           | DH898.4     | 0.64     | 3.29                | 0.86        | >50         |
|           | DH898.5     | 2.83     | 12.18               | 5.40        | >50         |
|           | DH898.6     | 3.12     | 21.67               | 5.74        | >50         |

IC50, μg/mL

|       |
|-------|
| <1    |
| 1-10  |
| 10-50 |
| >50   |

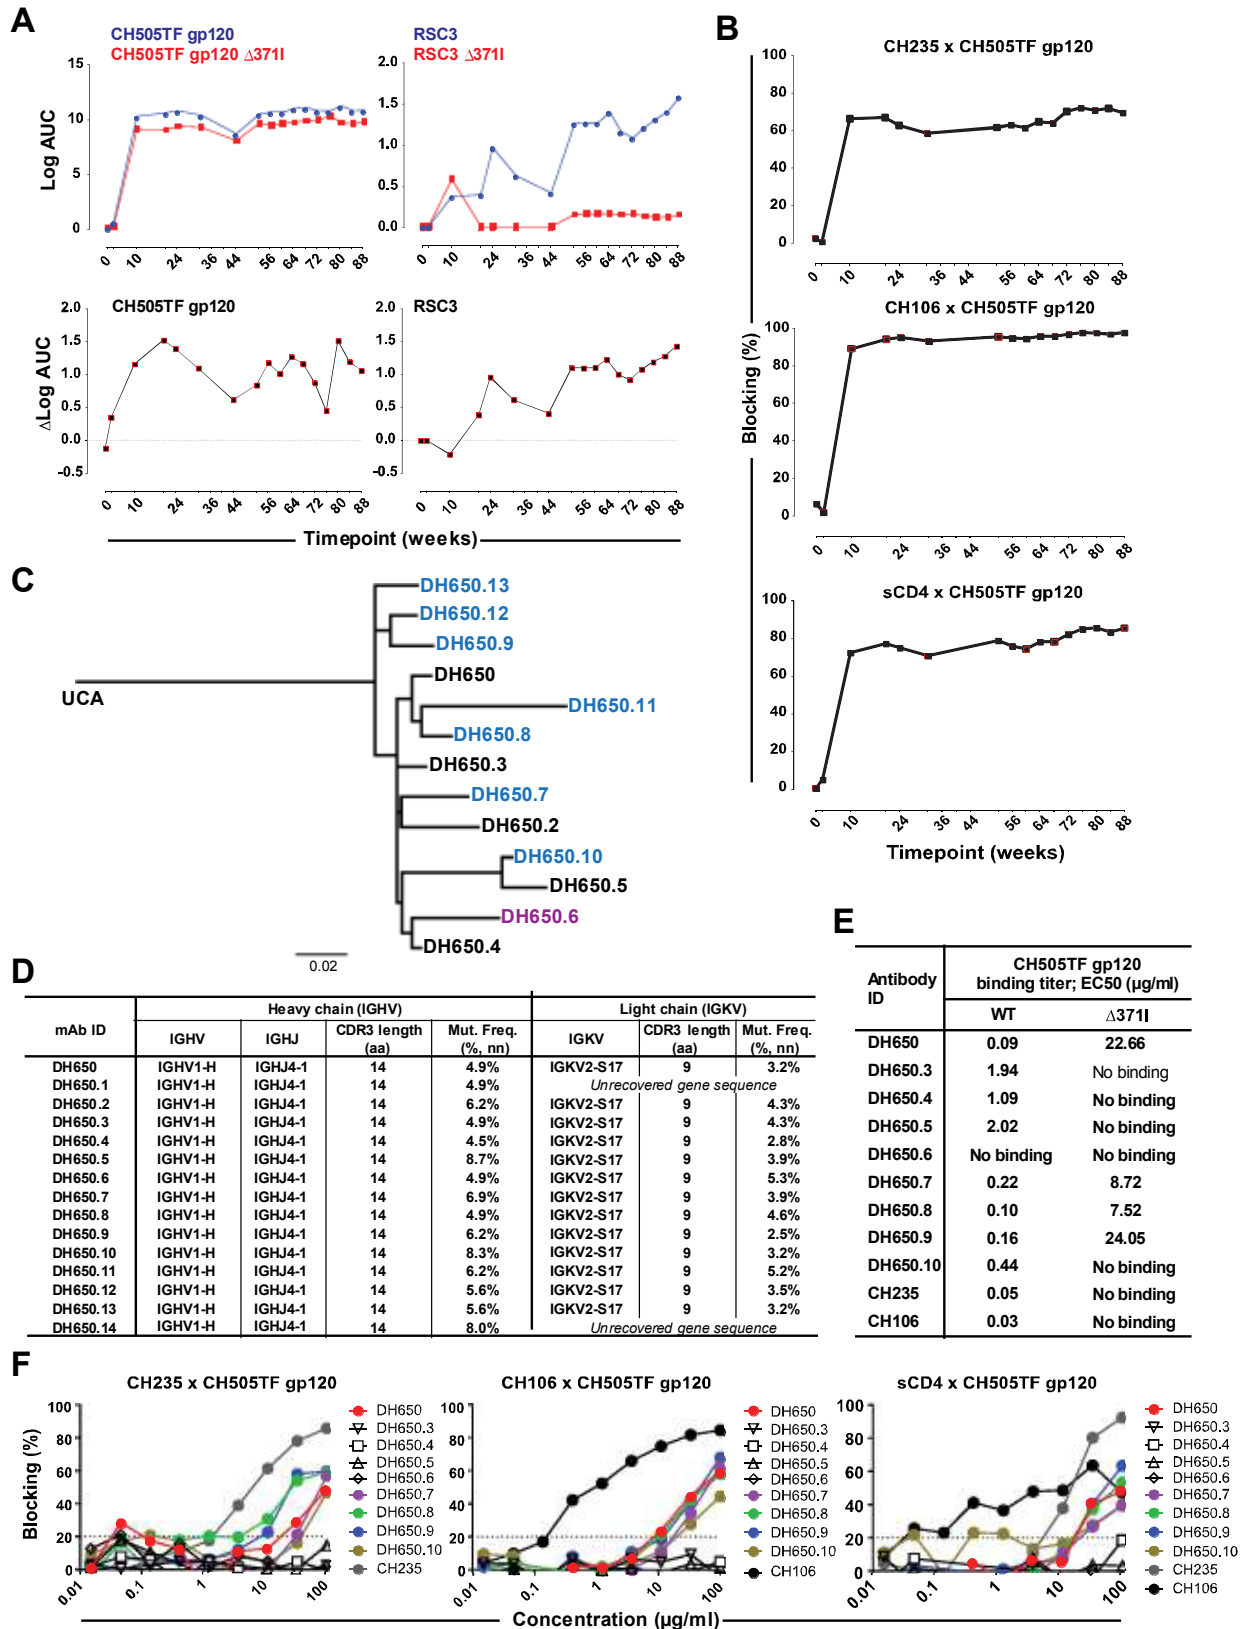

Supplemental Figure S15

**A**

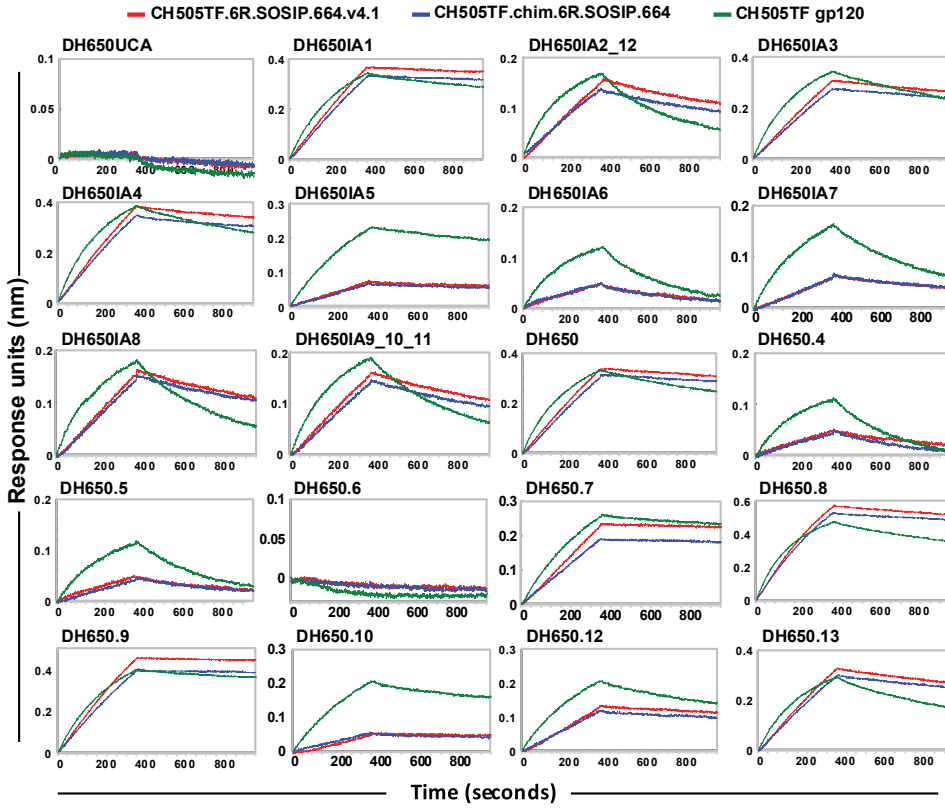

**B**

| IC50, µg/mL    | >50  | 10-50   | 1-10 | 0.1-1 | <0.1 |
|----------------|------|---------|------|-------|------|
| Antibody ID    | TF   | TF gly4 | MuLV |       |      |
| DH650UCA       | >50  | >50     | >50  |       |      |
| DH650IA1       | 3.8  | <0.02   | >50  |       |      |
| DH650IA2_12    | >50  | 0.06    | >50  |       |      |
| DH650IA3       | 4.2  | <0.02   | >50  |       |      |
| DH650IA4       | 4.6  | <0.02   | >50  |       |      |
| DH650IA5       | 11.4 | <0.02   | >50  |       |      |
| DH650IA6       | >50  | <0.02   | >50  |       |      |
| DH650IA7       | >50  | <0.02   | >50  |       |      |
| DH650IA8       | 20.0 | <0.02   | >50  |       |      |
| DH650IA9_10_11 | 20.0 | 0.03    | >50  |       |      |
| DH650          | 2.6  | <0.02   | >50  |       |      |
| DH650.2        | 10.0 | <0.02   | >50  |       |      |
| DH650.3        | >50  | 0.4     | >50  |       |      |
| DH650.4        | >50  | <0.02   | >50  |       |      |
| DH650.5        | >50  | 0.06    | >50  |       |      |
| DH650.6        | >50  | >50     | >50  |       |      |
| DH650.7        | 3.3  | <0.02   | >50  |       |      |
| DH650.8        | 2.0  | <0.02   | >50  |       |      |
| DH650.9        | 3.8  | <0.02   | >50  |       |      |
| DH650.10       | 10.3 | <0.02   | >50  |       |      |
| DH650.12       | 9.6  | <0.02   | >50  |       |      |
| DH650.13       | 8.3  | <0.02   | >50  |       |      |

**C**

| IC50, µg/mL | >50                                        | 10-50 | 1-10 | 0.1-1 | <0.1   |            |
|-------------|--------------------------------------------|-------|------|-------|--------|------------|
| Antibody ID | HIV-1 isolate/ Tier phenotype/ IC50, µg/mL |       |      |       |        |            |
|             | CH505 TF                                   | JRFL  | Q168 | Q842  | BG1168 | SF162 MuLV |
|             | 2                                          | 2     | 2    | 2     | 1      | 1 n/a      |
| DH650       | 9.6                                        | >50   | >50  | >50   | >50    | >50        |
| DH650.3     | >50                                        | >50   | >50  | >50   | >50    | >50        |
| DH650.4     | >50                                        | >50   | >50  | >50   | >50    | >50        |
| DH650.5     | >50                                        | >50   | >50  | >50   | >50    | >50        |
| DH650.6     | >50                                        | >50   | >50  | >50   | >50    | >50        |
| DH650.7     | 5.0                                        | >50   | >50  | >50   | >50    | >50        |
| DH650.8     | 4.5                                        | >50   | >50  | >50   | >50    | >50        |
| DH650.9     | 4.4                                        | >50   | >50  | >50   | >50    | >50        |
| DH650.10    | 23.7                                       | >50   | >50  | >50   | >50    | >50        |
| CH235       | 0.58                                       | 1.7   | >50  | 3.9   | >50    | >50        |





A

IGHV4-ABB-5\*01\_S8200  
 Q V Q L Q E S G P G L V K P S E T L S L T C A V S G G G D S F G F H Y W N W I R Q P P G K G L E

RHA1.V2.01H  
 CAGGTGCAGCTCGAGTGGGCCCAGGACTGGTGAAGCCTTCGGAGACCTCTCCCTCACTCGTGTCTCTGGTGGG-----TCCATCAGGGTACTACTGGAACTGGATCGCAACCCCAAGGGAAGGGCCGGAG

RHA1.V2.02H  
 CAGGTGCAGCTCGAGTGGGCCCAGGACTGGTGAAGCCTTCGGAGACCTCTCCCTCACTCGTGTCTCTGGTGGG-----TCCATCAGGGTACTACTGGAACTGGATCGCAACCCCAAGGGAAGGGCCGGAG

RHA1.V2.03H  
 CAGGTGCAGCTCGAGTGGGCCCAGGACTGGTGAAGCCTTCGGAGACCTCTCCCTCACTCGTGTCTCTGGTGGG-----TCCATCAGGGTACTACTGGAACTGGATCGCAACCCCAAGGGAAGGGCCGGAG

RHA1.V2.04H  
 CAGGTGCAGCTCGAGTGGGCCCAGGACTGGTGAAGCCTTCGGAGACCTCTCCCTCACTCGTGTCTCTGGTGGG-----TCCATCAGGGTACTACTGGAACTGGATCGCAACCCCAAGGGAAGGGCCGGAG

IGHV4-ABB-5\*01\_S8200  
 W I G Y I G G S S S G S T Y Y N P S L K S R V T I S T D T S K N Q F S L K L S S V T A A D T A V Y

RHA1.V2.01H  
 TGGATTGGCATAATCGGTGGCAGTACGGGAGCACTAACAACCCCTCCCTCAAGAGTCAAGCACCATTCAAAGGACACCCCAAGAACCACTCTCCCTCAAGCTCAGCTCTGCAACGGCCGGACAAGCCGCTGAT

RHA1.V2.02H  
 TGGATTGGCATAATCGGTGGTATAGTGGACATACCACTAACCCCTCCCTCAAGAGTCAAGTCAACATTCAAAGGACACCCCAAGAACCACTCTCCCTCAAGCTCAGCTCTGCAACGGCCGGACAAGCCGCTGAT

RHA1.V2.03H  
 TGGATTGGCATAATCGGTGGTATAGTGGCATAACCACTAACCCCTCCCTCAAGAGTCAAGTCAACATTCAAAGGACACCCCAAGAACCACTCTCCCTCAAGCTCAGCTCTGCAACGGCCGGACAAGCCGCTGAT

RHA1.V2.04H  
 TGGATTGGCATAATCGGTGGTATAGTGGACATACCACTAACCCCTCCCTCAAGAGTCAAGTCAACATTCAAAGGACACCCCAAGAACCACTCTCCCTCAAGCTCAGCTCTGCAACGGCCGGACAAGCCGCTGAT

IGHV4-ABB-5\*01\_S8200  
 Y C A R

RHA1.V2.01H  
 TCTGTGCGAGAAAAGGCGAAGACTTTTACGGAGGATACGGTCAATATTCACCCGAGGCTGGTCTCTGGTGGGCCCCTGGCACCCCAATCATCATCTCCCA

RHA1.V2.02H  
 TCTGTGCGAGAAAAGGCGAAGACTTTTACGGAGGATACGGTCAATATTCACCCGAGGCTGGTCTCTGGTGGGCCCCTGGCACCCCAATCATCATCTCCCA

RHA1.V2.03H  
 TCTGTGCGAGAAAAGGCGAAGACTTTTACGGAGGATACGGTCAATATTCACCCGAGGCTGGTCTCTGGTGGGCCCCTGGCACCCCAATCATCATCTCCCA

RHA1.V2.04H  
 TCTGTGCGAGAAAAGGCGAAGACTTTTACGGAGGATACGGTCAATATTCACCCGAGGCTGGTCTCTGGTGGGCCCCTGGCACCCCAATCATCATCTCCCA

B

IGLV1-ACN\*02  
 Q S V L T Q P P S V S G A P G Q R V T I S C T G S S S N I G G Y Y V Q W Y Q Q L P G

RHA1.V2.01L  
 CAGTGTGTGTGACGCGACCGCCCTCAGTGTCTGGGGCGCCCGGGCAGAGGGTACCACCTCTCCTGCACTGGGAGDAGTCCAACTTGGAGGTATTATGTCAGTGGTACCGAGAGTCCAGGA

RHA1.V2.02L  
 CAGTGTGTGTGACGCGACCGCCCTCAGTGTCTGGGGCGCCCGGGCAGAGGGTACCACCTCTCCTGCACTGGGAGDAGTCCAACTTGGAGGTATTATGTCAGTGGTACCGAGAGTCCAGGA

RHA1.V2.03L  
 CAGTGTGTGTGACGCGACCGCCCTCAGTGTCTGGGGCGCCCGGGCAGAGGGTACCACCTCTCCTGCACTGGGAGDAGTCCAACTTGGAGGTATTATGTCAGTGGTACCGAGAGTCCAGGA

RHA1.V2.04L  
 CAGTGTGTGTGACGCGACCGCCCTCAGTGTCTGGGGCGCCCGGGCAGAGGGTACCACCTCTCCTGCACTGGGAGDAGTCCAACTTGGAGGTATTATGTCAGTGGTACCGAGAGTCCAGGA

IGLV1-ACN\*02  
 T A P K L L I Y E N N K R P S G V S D R F S G S Q S G T S A S L T I T G L Q S E D E

RHA1.V2.01L  
 ACGGCCCCAAGACTCCTCATCTTAAAAATGATAAGCGGACCCCTCAGGGGTTTCTGATCGATTCTCTGGCTCCCACTCTGGTGCCTCAGCCTCCCTGACCATCACTGGACTCCAGTCTGAGGATGAG

RHA1.V2.02L  
 ACGGCCCCAAGACTCCTCATCTTAAAAATGATAAGCGGACCCCTCAGGGGTTTCTGATCGATTCTCTGGCTCCCACTCTGGTGCCTCAGCCTCCCTGACCATCACTGGACTCCAGTCTGAGGATGAG

RHA1.V2.03L  
 ACGGCCCCAAGACTCCTCATCTTAAAAATGATAAGCGGACCCCTCAGGGGTTTCTGATCGATTCTCTGGCTCCCACTCTGGTGCCTCAGCCTCCCTGACCATCACTGGACTCCAGTCTGAGGATGAG

RHA1.V2.04L  
 ACGGCCCCAAGACTCCTCATCTTAAAAATGATAAGCGGACCCCTCAGGGGTTTCTGATCGATTCTCTGGCTCCCACTCTGGTGCCTCAGCCTCCCTGACCATCACTGGACTCCAGTCTGAGGATGAG

IGLV1-ACN\*02  
 A D Y Y C Q S Y D S S L

RHA1.V2.01L  
 GCTGATTATTACTGCGAGTCCATGACAGGACCTATTAATCGGAAGGGGGAACCGGCTGACCGTCCCTG

RHA1.V2.02L  
 GCTGATTATTACTGCGAGTCCATGACAGGACCTATTAATCGGAAGGGGGAACCGGCTGACCGTCCCTG

RHA1.V2.03L  
 GCTGATTATTACTGCGAGTCCATGACAGGACCTATTAATCGGAAGGGGGAACCGGCTGACCGTCCCTG

RHA1.V2.04L  
 GCTGATTATTACTGCGAGTCCATGACAGGACCTATTAATCGGAAGGGGGAACCGGCTGACCGTCCCTG

**A**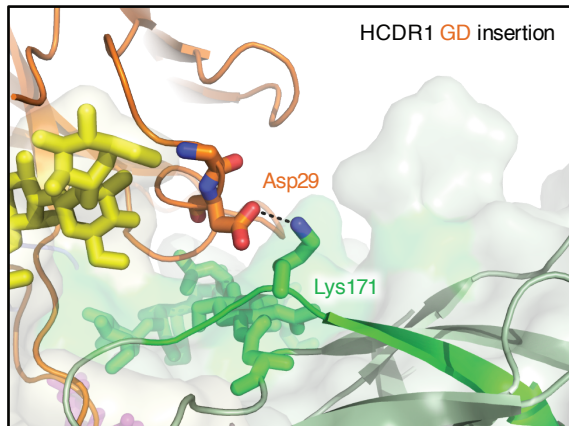**B**

VH4-ABB\*01 CAR-----  
 DH3-9 -----YYEDDYGY~~Y~~T-----  
 JH2-P -----WYFDLW  
 RHA1.V2.01 CARKGEDFYEDDYGQYFTAGWFFDLW  
 RHA1.V2.02 CARKGEDFYEDDYGQYFTAGWYFDLW  
 RHA1.V2.03 CARKGEDFYEDDYGQYFTAGWYFDLW  
 RHA1.V2.04 CARKGEDFYEDDYGQYFTAGWFFDLW

VH4-ABB\*01 CAR-----  
 DH3-9 -----YYEDDYGY~~Y~~T-----  
 JH2-P -----WYFDLW  
 RHA1.V2.01 ...KGEDF.....Q.F.AG.F.....  
 RHA1.V2.02 ...KGEDF.....Q.F.AG.......  
 RHA1.V2.03 ...KGEDF.....Q.F.AG.......  
 RHA1.V2.04 ...KGEDF.....Q.F.AG.F.....

**C**

|            |                                                                |
|------------|----------------------------------------------------------------|
| PGT145     | CLTGSKHRLRDYFLYNE <sup>*</sup> YGN <sup>*</sup> YEEWGDYLATLDVW |
| PCT64-35S  | CMT---GVERGDFWSDDY <sup>*</sup> S-QHYNT---YLIDVW               |
| RHA1.V2.01 | CAR---KGE <u>D</u> FYEDDYG-QYFTA---GWFFDLW                     |
| RHA1.V2.02 | CAR---KGE <u>D</u> FYEDDYG-QYFTA---GWYFDLW                     |
| RHA1.V2.03 | CAR---KGE <u>D</u> FYEDDYG-QYFTA---GWYFDLW                     |
| RHA1.V2.04 | CAR---KGE <u>D</u> FYEDDYG-QYFTA---GWFFDLW                     |

**D**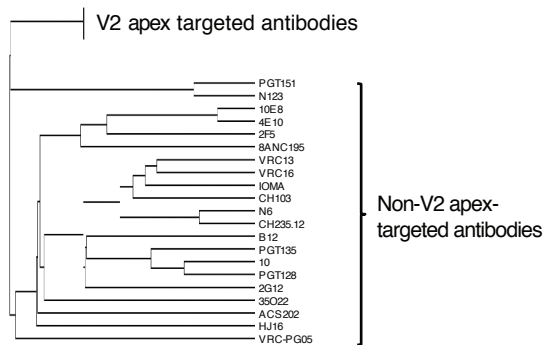**E**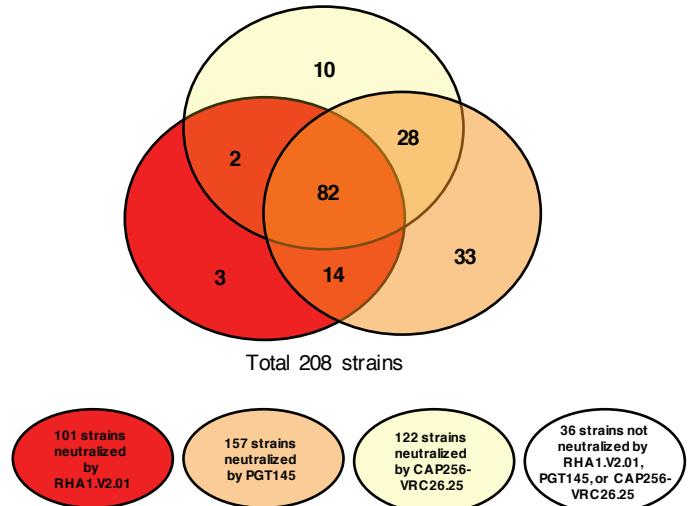

**A**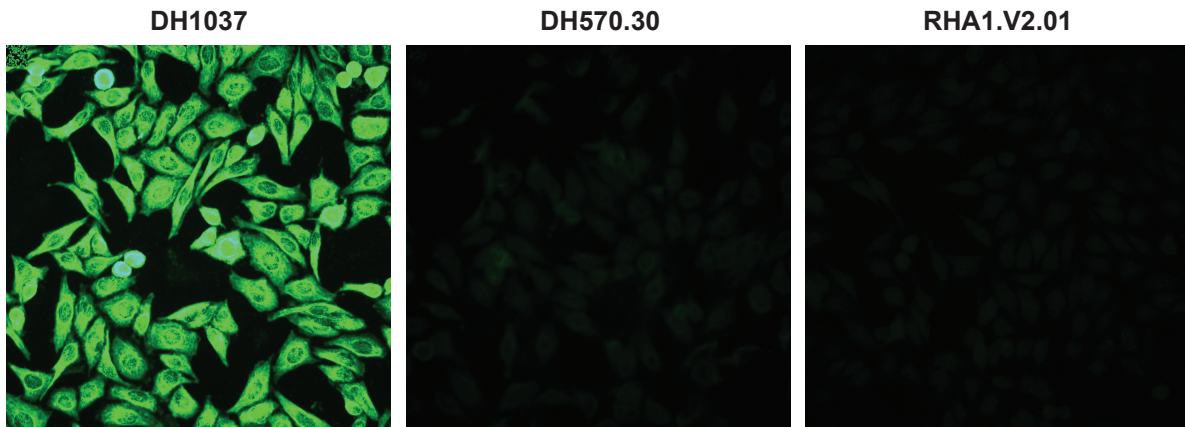**B****Autoantigens**

|                    | SSA | SSB | Sm | RNP | Sci 70 | Jo 1 | dsDNA | Cent B | Histone |
|--------------------|-----|-----|----|-----|--------|------|-------|--------|---------|
| Positive control 1 | -   | -   | -  | -   | -      | -    | -     | +      | -       |
| Positive control 2 | +   | +   | -  | -   | -      | +    | +     | -      | +       |
| Positive control 3 | -   | -   | +  | +   | +      | -    | -     | -      | -       |
| CH65               | -   | -   | -  | -   | -      | -    | -     | -      | -       |
| 4E10               | -   | +   | +  | -   | -      | +    | -     | +      | +       |
| RHA1.V2.01         | -   | -   | -  | -   | -      | -    | -     | -      | -       |

**Rhesus mAbs**

|                     |             | Rhesus mAbs |            |            |            | RM5695<br>wk56 plasma |
|---------------------|-------------|-------------|------------|------------|------------|-----------------------|
|                     |             | RHA1.V2.01  | RHA1.V2.02 | RHA1.V2.03 | RHA1.V2.04 |                       |
| <b>Global panel</b> | 246F3       | 0.21        | 0.24       | 0.31       | 0.24       | 109                   |
|                     | X1632       | 0.16        | 0.12       | 0.32       | 0.24       | 465                   |
|                     | 25710       | 0.74        | 0.33       | 2.18       | 1.76       | 28                    |
|                     | CNE55       | 0.35        | 0.63       | 2.75       | 1.45       | 20                    |
|                     | X2278       | 0.40        | 0.41       | 1.87       | 1.18       | 28                    |
|                     | BJOX0020000 | 1.94        | 0.64       | 1.99       | 2.09       | 22                    |
|                     | CNE8        | 4.09        | 1.27       | 6.78       | 5.76       | 179                   |
|                     | CE0217      | 3.085       | 1.77       | >50        | >50        | 26                    |
|                     | TRO.11      | >50         | >50        | >50        | >50        | 72                    |
|                     | CE1176.A3   | >50         | >50        | >50        | >50        | 20                    |
|                     | CH119.10    | >50         | 31         | >50        | >50        | <20                   |
|                     | BG505.T332N | 0.05        | 0.11       | 0.11       | 0.10       | 139                   |
|                     | CAP256SU    | 0.45        | 0.27       | 0.85       | 0.76       | 65                    |
|                     | ZM233.6     | 0.01        | 0.43       | 0.02       | 0.01       | 413                   |
| WITO.33             | 0.03        | 0.04        | 0.04       | 0.03       | 138        |                       |
| T250-4              | 0.01        | 0.01        | 0.02       | 0.01       | 1977       |                       |
| Q23.17              | 0.005       | 0.005       | 0.006      | 0.003      | 5051       |                       |
| MT145K              | 0.13        | 0.07        | 0.181      | 0.15       | 161        |                       |
| <b>autologous</b>   | CH505 TF    | 0.463       | 0.180      | 0.648      | 0.507      | 421                   |

IC50 ug/mL

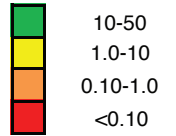

Plasma ID50

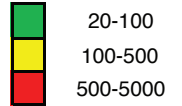

RHA1.V2.01

IC50 (ug/mL)

|           |
|-----------|
| .001-01   |
| .01-100   |
| 100-10.0  |
| 1.00-10.0 |
| >10.0     |

| Virus ID        | Clade | IC50 (ug/mL) |
|-----------------|-------|--------------|
| 0260.v5.c36     | A     | 13.9         |
| 0330.v4.c3      | A     | 0.046        |
| 0439.v5.c1      | A     | >50          |
| 3365.v2.c20     | A     | 0.390        |
| 3718.v3.c11     | A     | 0.809        |
| 398-F1.F6.20    | A     | >50          |
| BB201.B42       | A     | 0.010        |
| BB539.2B13      | A     | >50          |
| BG505.W6M.C2    | A     | 0.067        |
| BI369.9A        | A     | 0.083        |
| BS208.B1        | A     | 0.045        |
| KER2008.12      | A     | 0.043        |
| KER2018.11      | A     | 0.013        |
| KNH1209.18      | A     | 0.958        |
| MB201.A1        | A     | 14.7         |
| MB539.2B7       | A     | 1.36         |
| MI369.A5        | A     | 0.682        |
| MS208.A1        | A     | >50          |
| Q23.17          | A     | 0.005        |
| Q259.17         | A     | 0.397        |
| Q769.d22        | A     | >50          |
| Q769.h5         | A     | >50          |
| Q842.d12        | A     | 0.020        |
| QH209.14M.A2    | A     | >50          |
| RW020.2         | A     | >50          |
| UG037.8         | A     | >50          |
| 246-F3.C10.2    | AC    | 0.179        |
| 3301.v1.c24     | AC    | >50          |
| 3589.v1.c4      | AC    | >50          |
| 6540.v4.c1      | AC    | 0.199        |
| 6545.v4.c1      | AC    | 0.120        |
| 0815.v3.c3      | ACD   | >50          |
| 6095.v1.c10     | ACD   | 12.5         |
| 3468.v1.c12     | AD    | >50          |
| Q168.a2         | AD    | 0.069        |
| Q461.e2         | AD    | >50          |
| 620345.c1       | AE    | 23.5         |
| BJOX009000.02.4 | AE    | >50          |
| BJOX010000.06.2 | AE    | >50          |
| BJOX025000.01.1 | AE    | >50          |
| BJOX028000.10.3 | AE    | >50          |
| C1080.c3        | AE    | 0.001        |
| C2101.c1        | AE    | >50          |
| C3347.c11       | AE    | >50          |
| C4118.09        | AE    | 0.049        |
| CM244.ec1       | AE    | 0.004        |
| CNE3            | AE    | 0.041        |
| CNE5            | AE    | 0.017        |
| CNE55           | AE    | 1.17         |
| CNE56           | AE    | >50          |
| CNE59           | AE    | 0.102        |
| CNE8            | AE    | 8.55         |
| M02138          | AE    | >50          |
| R1166.c1        | AE    | >50          |
| R2184.c4        | AE    | >50          |
| R3265.c6        | AE    | >50          |
| TH023.6         | AE    | >50          |
| TH966.8         | AE    | 0.092        |
| TH976.17        | AE    | >50          |
| 235-47          | AG    | 0.251        |
| 242-14          | AG    | 0.869        |
| 263-8           | AG    | >50          |
| 269-12          | AG    | >50          |
| 271-11          | AG    | 0.018        |
| 928-28          | AG    | >50          |
| DJ263.8         | AG    | 1.06         |
| T250-4          | AG    | 0.010        |
| T251-18         | AG    | >50          |
| T253-11         | AG    | >50          |
| T255-34         | AG    | 0.077        |
| T257-31         | AG    | 30.3         |
| T266-60         | AG    | 13.5         |
| T278-50         | AG    | 9.27         |
| T280-5          | AG    | >50          |
| T33-7           | AG    | 0.011        |

| Virus ID        | Clade | IC50 (ug/mL) |
|-----------------|-------|--------------|
| 3988.25         | B     | 11.5         |
| 5768.04         | B     | 0.985        |
| 6101.10         | B     | >50          |
| 6535.3          | B     | 4.16         |
| 45_01dG5        | B     | 3.97         |
| 89.6.DG         | B     | >50          |
| AC10.29         | B     | 1.17         |
| ADA.DG          | B     | 8.96         |
| Bal.01          | B     | >50          |
| Bal.26          | B     | >50          |
| BG1168.01       | B     | >50          |
| BL01.DG         | B     | >50          |
| BR07.DG         | B     | >50          |
| BX08.16         | B     | 0.073        |
| CAAN.A2         | B     | >50          |
| CNE10           | B     | >50          |
| CNE12           | B     | >50          |
| CNE14           | B     | >50          |
| CNE4            | B     | >50          |
| CNE57           | B     | >50          |
| HO86.8          | B     | 43.6         |
| HT593.1         | B     | 6.70         |
| HXB2.DG         | B     | >50          |
| JRCSF.JB        | B     | 0.015        |
| JRFL.JB         | B     | >50          |
| MN.3            | B     | >50          |
| PVO.04          | B     | >50          |
| QH0515.01       | B     | >50          |
| QH0692.42       | B     | >50          |
| REJO.67         | B     | 1.06         |
| RHPA.7          | B     | >50          |
| SC422.8         | B     | >50          |
| SF162.LS        | B     | >50          |
| SS1196.01       | B     | >50          |
| THRO.18         | B     | >50          |
| TRJO.58         | B     | >50          |
| TRO.11          | B     | >50          |
| WITO.33         | B     | 0.019        |
| X2278.C2.B6     | B     | 0.133        |
| YU2.DG          | B     | >50          |
| BJOX002000.03.2 | BC    | 0.821        |
| CH038.12        | BC    | 1.97         |
| CH070.1         | BC    | 0.052        |
| CH117.4         | BC    | 0.005        |
| CH119.10        | BC    | 21.1         |
| CH181.12        | BC    | 0.009        |
| CNE15           | BC    | >50          |
| CNE19           | BC    | >50          |
| CNE20           | BC    | 7.47         |
| CNE21           | BC    | 0.069        |
| CNE40           | BC    | >50          |
| CNE7            | BC    | >50          |

| Virus ID         | Clade | IC50 (ug/mL) |
|------------------|-------|--------------|
| 286.36           | C     | 0.701        |
| 288.38           | C     | >50          |
| 0013095-2.11     | C     | >50          |
| 001428-2.42      | C     | 0.057        |
| 00836-2.5        | C     | >50          |
| 0921.v2.c14      | C     | >50          |
| 16055-2.3        | C     | 0.077        |
| 16845-2.22       | C     | >50          |
| 16936-2.21       | C     | >50          |
| 25710-2.43       | C     | 0.856        |
| 25711-2.4        | C     | >50          |
| 25925-2.22       | C     | 0.156        |
| 26191-2.48       | C     | 0.404        |
| 3168.v4.c10      | C     | >50          |
| 3637.v5.c3       | C     | >50          |
| 3873.v1.c24      | C     | 6.10         |
| 426c             | C     | >50          |
| 6322.v4.c1       | C     | >50          |
| 6471.v1.c16      | C     | >50          |
| 6631.v3.c10      | C     | >50          |
| 6644.v2.c33      | C     | >50          |
| 6785.v5.c14      | C     | 0.107        |
| 6838.v1.c35      | C     | 0.271        |
| 96ZM651.02       | C     | >50          |
| BR025.9          | C     | 0.051        |
| CAP210.E8        | C     | 11.2         |
| CAP244.D3        | C     | >50          |
| CAP256.206.C9    | C     | 0.225        |
| CAP45.G3         | C     | 0.006        |
| Ce1176.A3        | C     | >50          |
| CE703010217.B6   | C     | 2.19         |
| CNE30            | C     | >50          |
| CNE31            | C     | >50          |
| CNE53            | C     | 6.18         |
| CNE58            | C     | 0.045        |
| DU123.06         | C     | 0.281        |
| DU151.02         | C     | 1.05         |
| DU156.12         | C     | 0.350        |
| DU172.17         | C     | >50          |
| DU422.01         | C     | >50          |
| MW965.26         | C     | 12.6         |
| SO18.18          | C     | 0.205        |
| TV1.29           | C     | 2.28         |
| TZA125.17        | C     | 40.8         |
| TZBD.02          | C     | 4.01         |
| ZA012.29         | C     | >50          |
| ZM106.9          | C     | 24.7         |
| ZM109.4          | C     | >50          |
| ZM135.10a        | C     | >50          |
| ZM176.66         | C     | 0.078        |
| ZM197.7          | C     | 43.1         |
| ZM214.15         | C     | >50          |
| ZM215.8          | C     | >50          |
| ZM233.6          | C     | 0.009        |
| ZM249.1          | C     | 0.324        |
| ZM53.12          | C     | 0.589        |
| ZM55.28a         | C     | >50          |
| 3326.v4.c3       | CD    | 0.162        |
| 3337.v2.c6       | CD    | >50          |
| 3817.v2.c59      | CD    | >50          |
| 191821.E6.1      | D     | 48.6         |
| 231965.c01       | D     | >50          |
| 247-23           | D     | 0.211        |
| 3016.v5.c45      | D     | 0.572        |
| 57128.vrc15      | D     | >50          |
| 6405.v4.c34      | D     | >50          |
| A03349M1.vrc4a   | D     | >50          |
| A07412M1.vrc12   | D     | 9.22         |
| NKU3006.ec1      | D     | >50          |
| UG021.16         | D     | >50          |
| UG024.2          | D     | >50          |
| P0402.c2.11      | G     | 2.14         |
| P1981.C5.3       | G     | >50          |
| X1193.c1         | G     | >50          |
| X1254.c3         | G     | >50          |
| X1632.S2.B10     | G     | 0.112        |
| X2088.c9         | G     | >50          |
| X2131.C1.B5      | G     | 5.90         |
| SIVmac251.30.SG3 | NA    | >50          |
| SVA.MLV          | NA    | >50          |

RHA1.V2.01 RHA1.V2.03 RHA1.V2.04

|                      |       |       |       |
|----------------------|-------|-------|-------|
| <b>T250-4 wt</b>     | 0.012 | 0.019 | 0.017 |
| T250-4.K169E         | >25   | >25   | >25   |
| T250-4.R166S         | >25   | >25   | >25   |
| T250-4.N160K         | >25   | >25   | >25   |
| <b>246-F3 wt</b>     | 0.352 | 0.413 | 0.243 |
| 246-F3.R169E         | >25   | >25   | >25   |
| 246-F3.N160K         | >25   | >25   | >25   |
| <b>BG505.332N wt</b> | 0.164 | 0.268 | 0.278 |
| BG505.332N.K169E     | >25   | >25   | >25   |
| BG505.332N.R166S     | >25   | >25   | >25   |
| BG505.332N.N160K     | >25   | >25   | >25   |
| <b>CAP256SU wt</b>   | 0.412 | 0.791 | 0.428 |
| CAP256SU.K169E       | >25   | >25   | >25   |
| CAP256SU.R166S       | >25   | >25   | >25   |
| CAP256SU.T162I       | >25   | >25   | >25   |
| <b>X1632 wt</b>      | 0.433 | 0.284 | 0.118 |
| X1632.K169E          | >25   | >25   | >25   |
| X1632.N160K          | >25   | >25   | >25   |
| <b>MT145K wt</b>     | 0.16  | 0.25  | 0.23  |
| MT145K.K169E         | >25   | >25   | >25   |
| MT145K.R166S         | >25   | >25   | >25   |
| MT145K.N160D         | >25   | >25   | >25   |
| <b>Q23.17 wt</b>     | 0.007 | 0.009 | 0.008 |
| Q23.17.R169E         | >25   | >25   | >25   |
| Q23.17.R166S         | >25   | >25   | >25   |
| Q23.17.N160K         | 2.96  | 1.37  | 1.00  |

|       |          |        |       |
|-------|----------|--------|-------|
| <0.10 | 0.10-1.0 | 1.0-10 | 10-50 |
|-------|----------|--------|-------|

IC50 ug/mL

**A**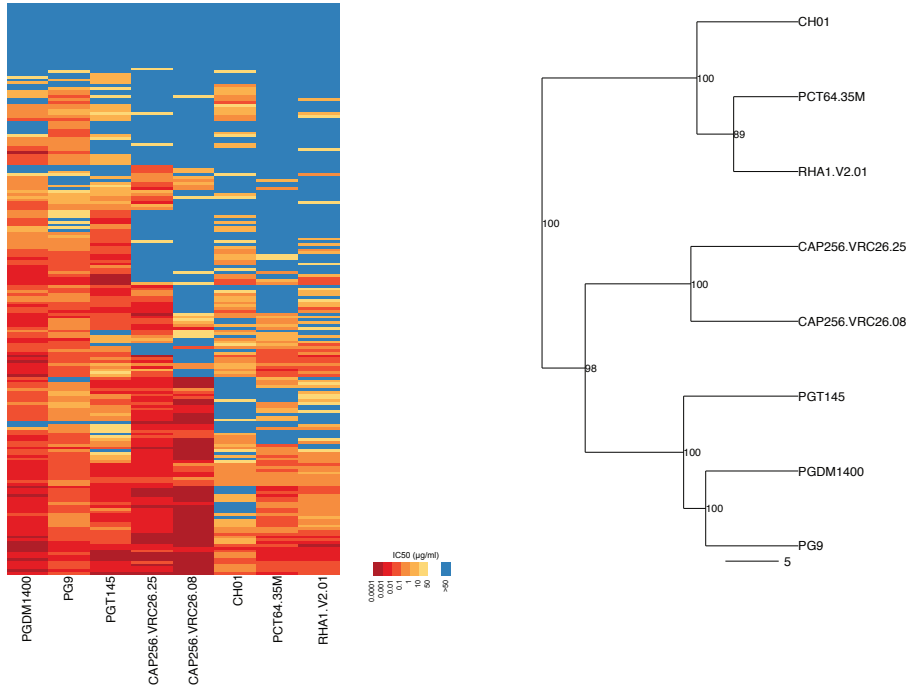**B**

|                                                                         | RHA1 sensitive | RHA1 resistant |
|-------------------------------------------------------------------------|----------------|----------------|
| PCT64-35M sensitive                                                     | 72             | 17             |
| PCT6-35M resistant                                                      | 29             | 90             |
| p=2.0x10 <sup>-16</sup> ; Odd's ratio (OR)=13.14; Accuracy (Acc) = 0.78 |                |                |

|                                                | RHA1 sensitive | RHA1 resistant |
|------------------------------------------------|----------------|----------------|
| CAP256.25 sensitive                            | 84             | 38             |
| CAP256.25 resistant                            | 17             | 69             |
| p=1.7x10 <sup>-12</sup> ; OR=57.35; Acc = 0.74 |                |                |

|                                                | RHA1 sensitive | RHA1 resistant |
|------------------------------------------------|----------------|----------------|
| PG9 sensitive                                  | 100            | 68             |
| PG9 resistant                                  | 1              | 39             |
| p=2.3x10 <sup>-12</sup> ; OR=57.35; Acc = 0.69 |                |                |

|                                                | RHA1 sensitive | RHA1 resistant |
|------------------------------------------------|----------------|----------------|
| PGDM1400 sensitive                             | 99             | 68             |
| PGDM1400 resistant                             | 2              | 39             |
| p=2.8x10 <sup>-11</sup> ; OR=28.39; Acc = 0.66 |                |                |

|                                              | RHA1 sensitive | RHA1 resistant |
|----------------------------------------------|----------------|----------------|
| PGT145 sensitive                             | 96             | 61             |
| PGT145 resistant                             | 5              | 46             |
| p=4.4x10 <sup>-11</sup> ; OR=14.47; Acc=0.68 |                |                |

|                                            | RHA1 sensitive | RHA1 resistant |
|--------------------------------------------|----------------|----------------|
| CAP256.08 sensitive                        | 67             | 28             |
| CAP256.08 resistant                        | 34             | 79             |
| p=7.3x10 <sup>-9</sup> ; OR=5.56; Acc=0.70 |                |                |

|                                            | RHA1 sensitive | RHA1 resistant |
|--------------------------------------------|----------------|----------------|
| CH01 sensitive                             | 72             | 38             |
| CH01 resistant                             | 29             | 69             |
| p=2.4x10 <sup>-7</sup> ; OR=4.51; Acc=0.67 |                |                |

**C**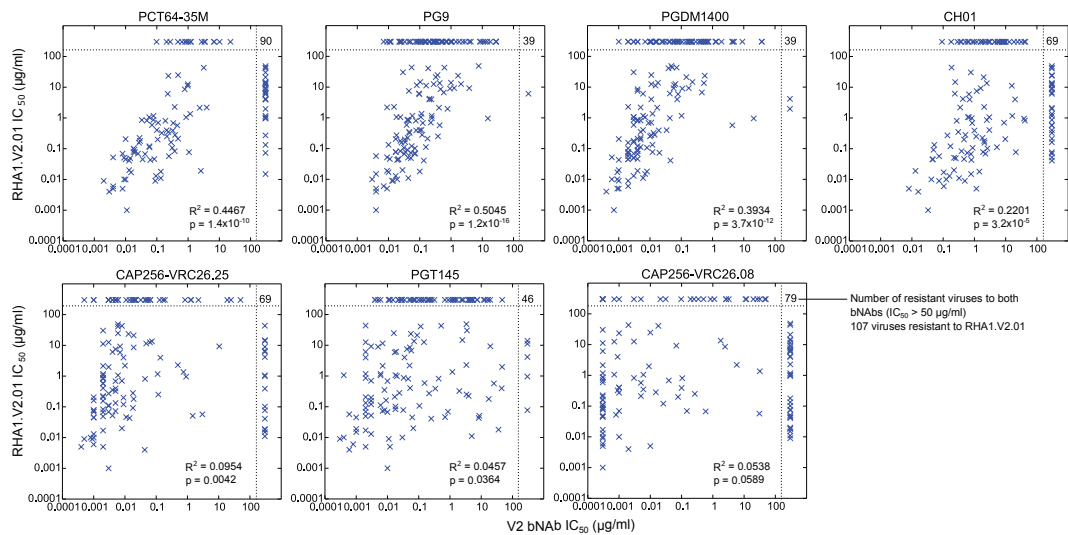







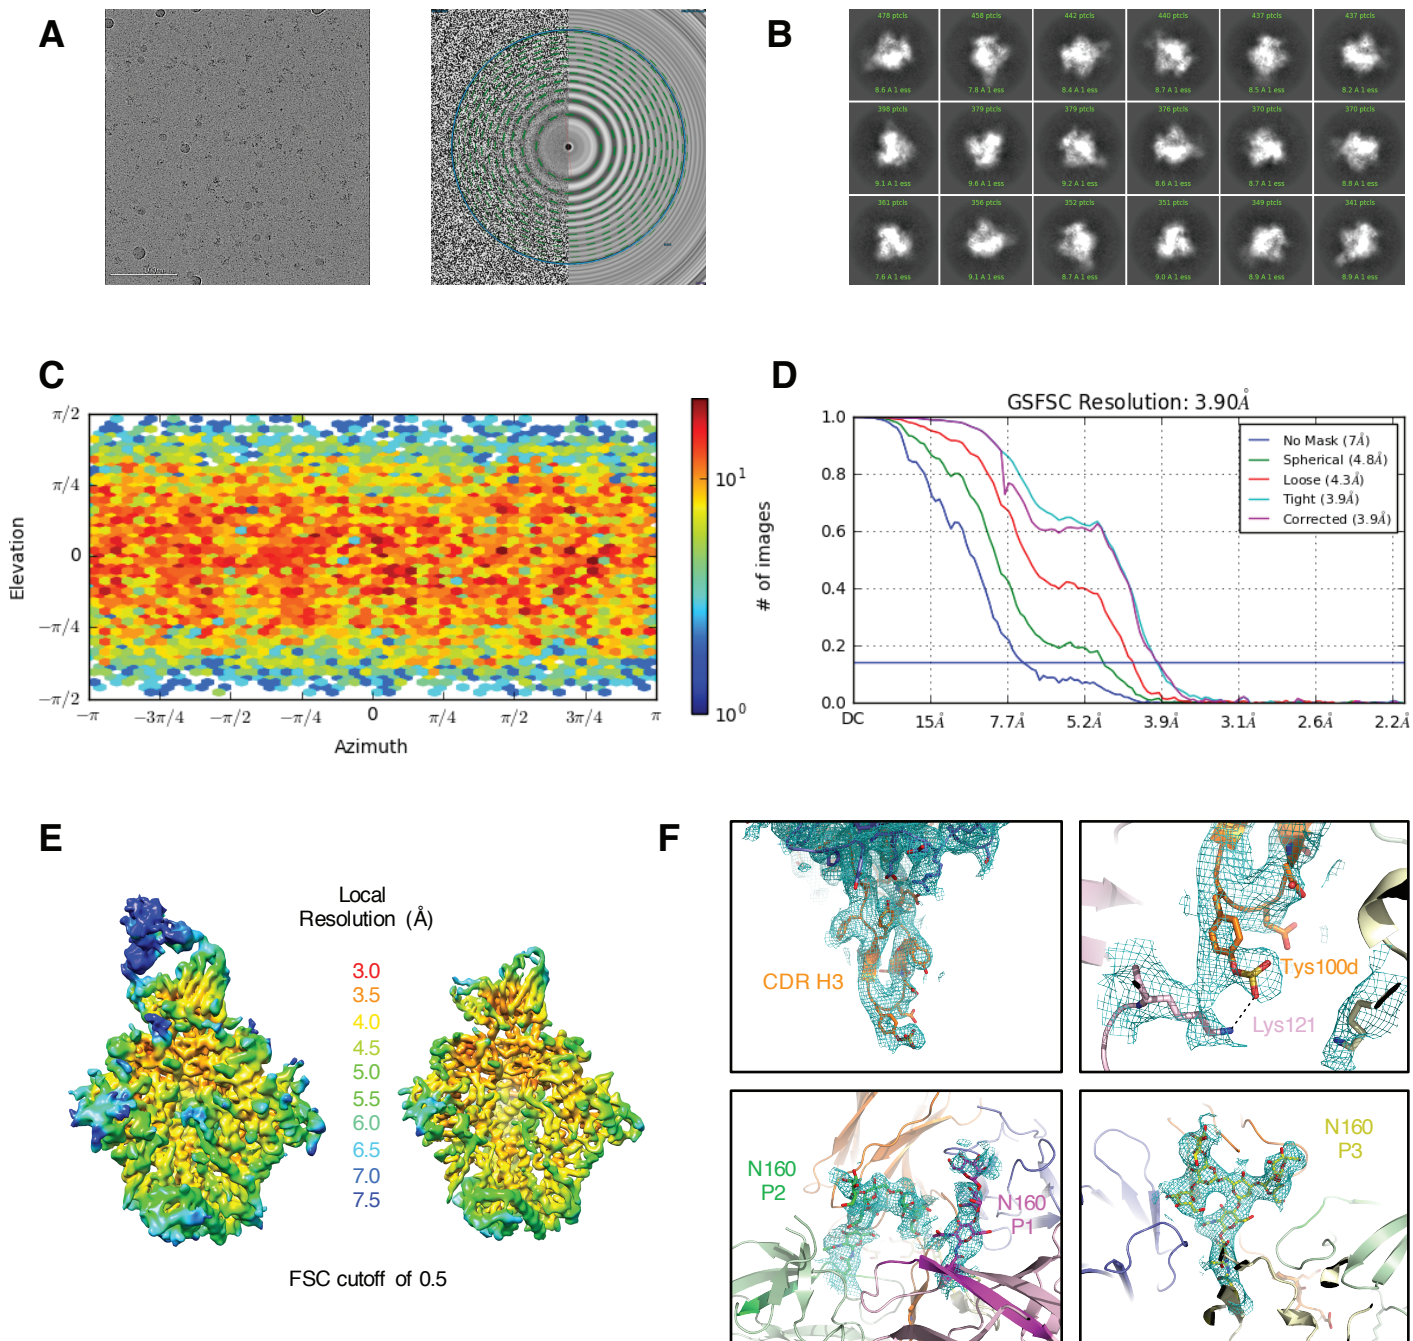

Supplement: NIHMS1679978-supplement-Supplementary_Figures_S1-S27.pdf [file NIHMS1679978-supplement-Supplementary_Figures_S1-S27.pdf]
