# Supplementary material
Source: PubMed Central journal article supplement (PMC8040783)
Supplement: NIHMS1679978-supplement-Supplementary_Tables_S1-S6.pdf [file NIHMS1679978-supplement-Supplementary_Tables_S1-S6.pdf]

**Table S1. Infection details, clinical parameters and neutralizing antibody responses in rhesus macaques**

| Animal ID | Inoculum      | Env Subtype | Route | Depletion of CD8 <sup>+</sup> cells | Weeks of Followup | VL Peak (copies/ml) | VL Setpoint (copies/ml) | Clinical AIDS | Peak autologous NAb Titer | bNAb Induction | bNAb Specificities |
|-----------|---------------|-------------|-------|-------------------------------------|-------------------|---------------------|-------------------------|---------------|---------------------------|----------------|--------------------|
| RM6069    | SHIV CH505    | C           | IV    | Yes*                                | 40                | 19,400,000          | 988,110                 | Yes           | 1396                      | No             |                    |
| RM6070    | SHIV CH505    | C           | IV    | Yes*                                | 36                | 62,600,000          | 736,483                 | Yes           | 7837                      | Yes            | V2 Apex            |
| RM6072    | SHIV CH505    | C           | IV    | Yes*                                | 184               | 15,700,000          | 20,405                  | No            | 3544                      | No             |                    |
| RM6697    | SHIV CH505    | C           | IV    | No                                  | 112               | 812,436             | 1,638                   | No            | 918                       | No             |                    |
| RM6698    | SHIV CH505    | C           | IV    | No                                  | 112               | 943,718             | 526                     | No            | 277                       | No             |                    |
| RM6699    | SHIV CH505    | C           | IV    | No                                  | 112               | 1,155,342           | 506                     | No            | 422                       | No             |                    |
| RM6701    | SHIV CH505    | C           | IV    | No                                  | 112               | 302,350             | <250                    | No            | <20                       | No             |                    |
| RM6702    | SHIV CH505    | C           | IV    | No                                  | 96                | 1,007,432           | <250                    | No            | 514                       | No             |                    |
| RM6703    | SHIV CH505    | C           | IV    | No                                  | 112               | 5,257,396           | 2,546                   | No            | 787                       | No             |                    |
| RM5695    | SHIV CH505#   | C           | IV    | No                                  | 65                | 4,791,344           | 12,110                  | Yes           | 573                       | Yes            | V2 Apex            |
| RM6163    | SHIV CH848    | C           | IV    | Yes*                                | 176               | 24,870,060          | 38,409                  | No            | 544                       | Yes            | V3 glycan          |
| RM6167    | SHIV CH848    | C           | IV    | Yes*                                | 136               | 116,025,900         | 117,295                 | Yes           | 558                       | Yes            | V3 glycan          |
| RM6700    | SHIV CH848    | C           | IV    | No                                  | 112               | 1,271,384           | 13,760                  | No            | 418                       | No             |                    |
| RM6713    | SHIV CH848    | C           | IV    | No                                  | 89                | 17,682,010          | 45,008                  | Yes           | 732                       | No             |                    |
| RM6714    | SHIV CH848    | C           | IV    | No                                  | 112               | 832,110             | 15,114                  | No            | 655                       | No             |                    |
| RM6720    | SHIV CH848    | C           | IV    | No                                  | 112               | 1,323,796           | <250                    | No            | 187                       | No             |                    |
| RM40591   | SHIV CAP256SU | C           | IV    | No                                  | 129               | 2,540,090           | 24,676                  | No            | 3067                      | Yes            | V2 Apex            |
| RM42056   | SHIV CAP256SU | C           | IV    | Yes^                                | 88                | 55,885,850          | 8,130                   | No            | 347                       | Yes            | V2 Apex            |
| RM6727    | SHIV CAP256SU | C           | IV    | Yes^                                | 60                | 5,282,264           | 67,392                  | Yes           | 665                       | Yes            | Unknown            |
| RM43037   | SHIV CAP256SU | C           | IV    | Yes^                                | 88                | 11,662,030          | 10,280                  | No            | 492                       | No             |                    |
| RM40547   | SHIV CAP256SU | C           | IV    | No                                  | 88                | 825,090             | <250                    | No            | <20                       | No             |                    |
| RM40624   | SHIV CAP256SU | C           | IV    | No                                  | 88                | 670,330             | <250                    | No            | <20                       | No             |                    |

# Plasma from RMs 6069 (wk10 & wk20), 6070 (wk10 & wk20), 6072 (wk4, wk10 & wk20)

\* Anti-CD8 $\alpha$  antibody (MT807R1, NHP Reagent Resource), 50 mg/kg by slow intravenous push administered on day 0 with respect to SHIV inoculation.

^ Anti-CD8 $\beta$  antibody (CD8beta255R1, NHP Reagent Resource), 25mg/kg by slow intravenous push administered on day -7 with respect to SHIV inoculation.



**Table S3. Neutralization breadth of DH650.8 against 118-strain panel**

| Virus ID           | Clade*         | Titer (µg/ml) |
|--------------------|----------------|---------------|
|                    |                | DH650.8       |
|                    |                | IC50          |
| 6535.3             | B              | >50           |
| QH0692.42          | B              | >50           |
| SC422661.8         | B              | >50           |
| PVO.4              | B              | >50           |
| TRO.11             | B              | >50           |
| AC10.0.29          | B              | >50           |
| RHPA4259.7         | B              | >50           |
| THRO4156.18        | B              | >50           |
| REJO4541.67        | B              | >50           |
| TRJO4551.58        | B              | >50           |
| WITO4160.33        | B              | >50           |
| CAAN5342.A2        | B              | >50           |
| WEAU_d15_410_787   | B (T/F)        | >50           |
| 1006_11_C3_1601    | B (T/F)        | >50           |
| 1054_07_TC4_1499   | B (T/F)        | >50           |
| 1056_10_TA11_1826  | B (T/F)        | >50           |
| 1012_11_TC21_3257  | B (T/F)        | >50           |
| 6240_08_TA5_4622   | B (T/F)        | >50           |
| 6244_13_B5_4576    | B (T/F)        | >50           |
| 62357_14_D3_4589   | B (T/F)        | >50           |
| SC05_8C11_2344     | B (T/F)        | >50           |
| Du156.12           | C              | >50           |
| Du172.17           | C              | >50           |
| Du422.1            | C              | >50           |
| ZM197M.PB7         | C              | >50           |
| ZM214M.PL15        | C              | >50           |
| ZM233M.PB6         | C              | >50           |
| ZM249M.PL1         | C              | >50           |
| ZM53M.PB12         | C              | >50           |
| ZM109F.PB4         | C              | >50           |
| ZM135M.PL10a       | C              | >50           |
| CAP45.2.00.G3      | C              | >50           |
| CAP210.2.00.E8     | C              | >50           |
| HIV-001428-2.42    | C              | >50           |
| HIV-0013095-2.11   | C              | >50           |
| HIV-16055-2.3      | C              | >50           |
| HIV-16845-2.22     | C              | >50           |
| Ce1086_B2          | C (T/F)        | >50           |
| Ce0393_C3          | C (T/F)        | >50           |
| Ce1176_A3          | C (T/F)        | >50           |
| Ce2010_F5          | C (T/F)        | >50           |
| Ce0682_E4          | C (T/F)        | >50           |
| Ce1172_H1          | C (T/F)        | >50           |
| Ce2060_G9          | C (T/F)        | >50           |
| Ce703010054_2A2    | C (T/F)        | >50           |
| BF1266.431a        | C (T/F)        | >50           |
| 246F C1G           | C (T/F)        | >50           |
| 249M B10           | C (T/F)        | >50           |
| ZM247v1(Rev-)      | C (T/F)        | >50           |
| 7030102001E5(Rev-) | C (T/F)        | >50           |
| 1394C9G1(Rev-)     | C (T/F)        | >50           |
| Ce704809221_1B3    | C (T/F)        | >50           |
| CNE19              | BC             | >50           |
| CNE20              | BC             | >50           |
| CNE21              | BC             | >50           |
| CNE17              | BC             | >50           |
| CNE30              | BC             | >50           |
| CNE52              | BC             | >50           |
| CNE53              | BC             | >50           |
| CNE58              | BC             | >50           |
| MS208.A1           | A              | >50           |
| Q23.17             | A              | >50           |
| Q461.e2            | A              | >50           |
| Q769.d22           | A              | >50           |
| Q259.d2.17         | A              | >50           |
| Q842.d12           | A              | >50           |
| 0260.v5.c36        | A              | >50           |
| 3415.v1.c1         | A              | >50           |
| 0330.v4.c3         | A              | >50           |
| 191955_A11         | A (T/F)        | >50           |
| 191084_B7-19       | A (T/F)        | >50           |
| 9004SS_A3_4        | A (T/F)        | >50           |
| T257-31            | CRF02_AG       | >50           |
| 928-28             | CRF02_AG       | >50           |
| 263-8              | CRF02_AG       | >50           |
| T250-4             | CRF02_AG       | >50           |
| T251-18            | CRF02_AG       | >50           |
| T278-50            | CRF02_AG       | >50           |
| T255-34            | CRF02_AG       | >50           |
| 211-9              | CRF02_AG       | >50           |
| 235-47             | CRF02_AG       | >50           |
| 620345.c01         | CRF01_AE       | >50           |
| CNE8               | CRF01_AE       | >50           |
| C1080.c03          | CRF01_AE       | >50           |
| R2184.c04          | CRF01_AE       | >50           |
| R1166.c01          | CRF01_AE       | >50           |
| R3265.c06          | CRF01_AE       | Not tested    |
| C2101.c01          | CRF01_AE       | >50           |
| C3347.c11          | CRF01_AE       | >50           |
| C4118.c09          | CRF01_AE       | >50           |
| CNE5               | CRF01_AE       | >50           |
| BJOX009000.02.4    | CRF01_AE       | >50           |
| BJOX015000.11.5    | CRF01_AE (T/F) | >50           |
| BJOX010000.06.2    | CRF01_AE (T/F) | >50           |
| BJOX025000.01.1    | CRF01_AE (T/F) | >50           |
| BJOX028000.10.3    | CRF01_AE (T/F) | >50           |
| X1193_c1           | G              | >50           |
| P0402_c2_11        | G              | >50           |
| X1254_c3           | G              | >50           |
| X2088_c9           | G              | >50           |
| X2131_C1_B5        | G              | >50           |
| P1981_C5_3         | G              | >50           |
| X1632_S2_B10       | G              | >50           |
| 3016.v5.c45        | D              | >50           |
| A07412M1.vrc12     | D              | >50           |
| 231965.c01         | D              | >50           |
| 231966.c02         | D              | >50           |
| 3817.v2.c59        | CD             | >50           |
| 6480.v4.c25        | CD             | >50           |
| 6952.v1.c20        | CD             | >50           |
| 6811.v7.c18        | CD             | >50           |
| 89-F1_2_25         | CD             | >50           |
| 3301.v1.c24        | AC             | >50           |
| 6041.v3.c23        | AC             | >50           |
| 6540.v4.c1         | AC             | >50           |
| 6545.v4.c1         | AC             | >50           |
| 0815.v3.c3         | ACD            | >50           |
| 3103.v3.c10        | ACD            | >50           |

\* (T/F): Transmitted / Founder Virus

**Table S4. Diffraction and Refinement Statistics**

| <b>DH650 + GP120</b>             |                                     |
|----------------------------------|-------------------------------------|
| <b>PDB ID</b>                    | 6XCJ                                |
| <b>Diffraction data</b>          |                                     |
| Space group                      | <i>P2<sub>1</sub>2<sub>1</sub>2</i> |
| Cell dimensions                  |                                     |
| Lengths (Å) a, b, c              | 138.5 122.1 53.4                    |
| Angles (°) α, β, γ               | 90.0 90.0 90.0                      |
| d <sub>min</sub> (Å)             | 2.80 (2.97-2.80) <sup>a</sup>       |
| R <sub>merge</sub> <sup>b</sup>  | 0.13 (1.52)                         |
| CC <sub>1/2</sub>                | 99.7 (64.4)                         |
| Avg I/ I <sub>1</sub>            | 13.99 (1.28)                        |
| Completeness (%)                 | 99.8 (99.9)                         |
| Average redundancy               | 5.5 (5.6)                           |
| <b>Refinement</b>                |                                     |
| Data range (Å)                   | 49.9-2.80                           |
| Reflections                      | 20,060                              |
| R/R <sub>free</sub> <sup>c</sup> | 0.23/0.28                           |
| RMS deviations                   |                                     |
| Bond (Å)                         | 0.008                               |
| Angles (°)                       | 1.02                                |
| Avg B-factor (Å <sup>2</sup> )   |                                     |
| Protein                          | 54.2                                |
| Water                            | 33.32                               |
| Number of Atoms                  |                                     |
| Protein                          | 5,565                               |
| Water                            | 21                                  |

<sup>a</sup> Values in parentheses are for the outermost shell of data.

<sup>b</sup>  $R_{\text{merge}} = \frac{\sum |I_i - \langle I \rangle|}{\sum I_i}$ , where  $I_i$  is the intensity of the  $i^{\text{th}}$  observation and  $\langle I \rangle$  is the mean intensity. Sums are taken over all reflections.

<sup>c</sup>  $R = \frac{\sum |F_o| - |F_c|}{\sum |F_o|}$ .  $R_{\text{free}}$  is calculated for a 5% subset of the data

**Table S5. RM5695 personalized Ig germline repertoire**

| Heavy                |                    |                 | Lambda               |                    |              |
|----------------------|--------------------|-----------------|----------------------|--------------------|--------------|
| IGHV                 | GenBank Accession* | IGHJ            | IGLV                 | GenBank Accession* | IGLJ         |
| IGHV1-AAU-U*01       |                    | JH-1*01         | IGLV1-ABB*01_S4519   | MT656217           | JL1*01       |
| IGHV1-AAU-U*02       |                    | JH-2P*01        | IGLV1-ABB*01_S6715   | MT656218           | JL2*01       |
| IGHV1-ABW-S*01_S9171 | MT656172           | JH-3*01         | IGLV1-ABB*01_S8237   | MT656219           | JL3*01       |
| IGHV1-AEP*01         |                    | JH-4*01         | IGLV1-ABN*02_S2133   | MT656220           | JL6*01_S7212 |
| IGHV1-AFS*01         |                    | JH-5-1*01_S8786 | IGLV1-ABN*02_S8168   | MT656221           | JL7*02       |
| IGHV1-AGS*02_S4535   | MT656173           | JH-5-2*01       | IGLV1-ABS*01_S5111   | MT656222           |              |
| IGHV1-AGS*02_S6849   | MT656174           | JH-6*01         | IGLV1-ACN*02         |                    |              |
| IGHV2-ABG-S*01       |                    |                 | IGLV1-ACR*01         |                    |              |
| IGHV2-ABG-S*02_S2032 | MT656175           |                 | IGLV1-ACV*01_S2830   | MT656223           |              |
| IGHV2-ABU-S*01_S6524 | MT656176           |                 | IGLV1-ACV*01_S4108   | MT656224           |              |
| IGHV2-AEY-S*01       |                    |                 | IGLV1-ACW*02         |                    |              |
| IGHV2-AEY-S*01_S8940 | MT656177           |                 | IGLV1-ADA*01         |                    |              |
| IGHV3-AAB*01         |                    |                 | IGLV1-ADL*01         |                    |              |
| IGHV3-AAB*02         |                    |                 | IGLV1-ADU*01_S4142   | MT656225           |              |
| IGHV3-ABA*01         |                    |                 | IGLV1-ADU*01_S8066   | MT656226           |              |
| IGHV3-ABA*01_S4331   | MT656178           |                 | IGLV2-ABE*01_S2946   | MT656227           |              |
| IGHV3-ABJ*01_S1922   | MT656179           |                 | IGLV2-ABE*01_S9768   | MT656228           |              |
| IGHV3-ABK*01_S3779   | MT656180           |                 | IGLV2-ABI*01_S7244   | MT656229           |              |
| IGHV3-ABY-S*01       |                    |                 | IGLV2-ABI*01_S8018   | MT656230           |              |
| IGHV3-ABY-S*01_S8824 | MT656181           |                 | IGLV2-ABJ*01_S9052   | MT656231           |              |
| IGHV3-ABY-S*03_S0204 | MT656182           |                 | IGLV2-ABU*01_S3471   | MT656232           |              |
| IGHV3-ACA*01         |                    |                 | IGLV2-ABX*01_S5497   | MT656233           |              |
| IGHV3-ACN*01_S7808   | MT656183           |                 | IGLV2-ACE*01_S4286   | MT656234           |              |
| IGHV3-ACZ*03         |                    |                 | IGLV2-ACE*01_S7743   | MT656235           |              |
| IGHV3-ADF*01_S4250   | MT656184           |                 | IGLV2-ADC*01         |                    |              |
| IGHV3-ADL-S*01_S4190 | MT656185           |                 | IGLV2-ADC*01_S5785   | MT656236           |              |
| IGHV3-ADO*01         |                    |                 | IGLV2-ADK*01         |                    |              |
| IGHV3-ADR*01         |                    |                 | IGLV3-AAB*01_S3980   | MT656237           |              |
| IGHV3-ADR*03_S0556   | MT656186           |                 | IGLV3-AAB*01_S5697   | MT656238           |              |
| IGHV3-ADR*03_S5688   | MT656187           |                 | IGLV3-AAI*01_S0428   | MT656239           |              |
| IGHV3-ADX*01_S5510   | MT656188           |                 | IGLV3-AAV*01         |                    |              |
| IGHV3-AEH*01_S5714   | MT656189           |                 | IGLV3-AAV*04         |                    |              |
| IGHV3-AEH*01_S6567   | MT656190           |                 | IGLV3-ACB*01_S7967   | MT656240           |              |
| IGHV3-AET*01_S5460   | MT656191           |                 | IGLV3-ADT*01_S0731   | MT656241           |              |
| IGHV3-AEW-S*03       |                    |                 | IGLV3-AEB-X*02       |                    |              |
| IGHV3-AEW-S*03_S2686 | MT656192           |                 | IGLV3-AEB-X*03_S6646 | MT656242           |              |
| IGHV3-AFC*01_S2394   | MT656193           |                 | IGLV3-AEC-X*01       |                    |              |
| IGHV3-AFE*01_S4619   | MT656194           |                 | IGLV3-AED-X*01_S4855 | MT656243           |              |
| IGHV3-AFR*01_S0643   | MT656195           |                 | IGLV3-AED-X*01_S6916 | MT656244           |              |
| IGHV3-AFW*01_S5271   | MT656196           |                 | IGLV3-AED-X*06_S3217 | MT656245           |              |
| IGHV3-AFY-S*02       |                    |                 | IGLV3-AED-X*06_S4240 | MT656246           |              |
| IGHV3-AFY-S*06       |                    |                 | IGLV4-ACF*01_S1875   | MT656247           |              |
| IGHV3-AGQ-S*02_S3249 | MT656197           |                 | IGLV4-ACF*02         |                    |              |
| IGHV4-ABB-S*01_S0511 | MT656198           |                 | IGLV5-AAM*01         |                    |              |
| IGHV4-ABB-S*01_S8200 | MT656199           |                 | IGLV5-AAP*01         |                    |              |
| IGHV4-ADD*01_S6003   | MT656200           |                 | IGLV5-AAP*01_S8201   | MT656248           |              |
| IGHV4-ADD*01_S9501   | MT656201           |                 | IGLV5-AAX*01         |                    |              |
| IGHV4-ADG-U*01_S1296 | MT656202           |                 | IGLV5-ABG*01_S1697   | MT656249           |              |
| IGHV4-AEB*01_S7180   | MT656203           |                 | IGLV5-ABL*01         |                    |              |
| IGHV4-AEX-S*01       |                    |                 | IGLV5-ABT*01_S4414   | MT656250           |              |
| IGHV4-AEX-S*01_S0860 | MT656204           |                 | IGLV5-ACY*01         |                    |              |
| IGHV4-AEX-S*01_S4729 | MT656205           |                 | IGLV5-ADQ*01_S3524   | MT656251           |              |
| IGHV4-AFB-S*01       |                    |                 | IGLV6-AAC*01_S4139   | MT656252           |              |
| IGHV4-AFB-S*01_S8393 | MT656206           |                 | IGLV6-ADD*01_S2475   | MT656253           |              |
| IGHV4-AFI*01_S1365   | MT656207           |                 | IGLV6-ADW*01         |                    |              |
| IGHV4-AFL-U*01       |                    |                 | IGLV7-AAK*01         |                    |              |
| IGHV4-AFQ-U*01       |                    |                 | IGLV7-ABO*01         |                    |              |
| IGHV4-AFQ-U*01_S2532 | MT656208           |                 | IGLV7-ADB*01         |                    |              |
| IGHV4-AFU-U*01       |                    |                 | IGLV8-ABK*01         |                    |              |
| IGHV4-AFU-U*01_S9450 | MT656209           |                 | IGLV10-AAO*01        |                    |              |
| IGHV4-AGL*01_S3100   | MT656210           |                 | IGLV11-AAY*01        |                    |              |
| IGHV4-AGR*01         |                    |                 |                      |                    |              |
| IGHV4-AGU*01         |                    |                 |                      |                    |              |
| IGHV4-AGU*01_S1118   | MT656211           |                 |                      |                    |              |
| IGHV4-AGU*01_S2780   | MT656212           |                 |                      |                    |              |
| IGHV5-ABI*01_S2502   | MT656213           |                 |                      |                    |              |
| IGHV5-ABI*02_S3096   | MT656214           |                 |                      |                    |              |
| IGHV7-ABS*01_S4281   | MT656215           |                 |                      |                    |              |
| IGHV7-AGO-S*01       |                    |                 |                      |                    |              |
| IGHV7-AGO-S*03_S8272 | MT656216           |                 |                      |                    |              |

\*Sequences with GenBank accession numbers represent novel alleles identified by IgDiscover analysis of Ig gene transcripts from IgM+IgD+IgG- B cells from animal RM5695

**Table S6. Cryo-EM Data Collection and Refinement Statistics**

| <b>RHA1.V2.01 in complex with<br/>HIV-1 Env BG505 DS-SOSIP</b> |                 |
|----------------------------------------------------------------|-----------------|
| <b>EMDB ID</b>                                                 | 22295           |
| <b>PDB ID</b>                                                  | 6XRT            |
| <b><u>Data Collection</u></b>                                  |                 |
| Microscope                                                     | FEI Titan Krios |
| Voltage (kV)                                                   | 300             |
| Electron dose (e <sup>-</sup> /Å <sup>2</sup> )                | 71.06           |
| Detector                                                       | Gatan K2 Summit |
| Pixel Size (Å)                                                 | 1.073           |
| Defocus Range (μm)                                             | -0.1 to -4.1    |
| Magnification                                                  | 22500           |
| <b><u>Reconstruction</u></b>                                   |                 |
| Software                                                       | cryoSparcV2.12  |
| Particles                                                      | 21,480          |
| Symmetry                                                       | C1              |
| Box size (pix)                                                 | 288             |
| Resolution (Å) (FSC <sub>0.143</sub> )                         | 3.9             |
| <b><u>Refinement</u></b>                                       |                 |
| Software                                                       | Phenix 1.18     |
| Protein residues                                               | 1947            |
| Chimera CC                                                     | 0.87            |
| EMRinger Score                                                 | 1.49            |
| R.m.s. deviations                                              |                 |
| Bond lengths (Å)                                               | 0.005           |
| Bond angles (°)                                                | 1.114           |
| <b><u>Validation</u></b>                                       |                 |
| Molprobit score                                                | 1.61            |
| Clash score                                                    | 4.97            |
| Favored rotamers (%)                                           | 99.1            |
| Ramachandran                                                   |                 |
| Favored regions (%)                                            | 95.06           |
| Disallowed regions (%)                                         | 0.0             |
